# Supplementary material for: The Functional Redundancy of Neddylation E2s and E3s in Modulating the Fitness of Regulatory T Cells
Source: PubMed Central journal article supplement (PMC10437198; doi:10.34133/research.0212), 2023-08-18
Supplement: research.0212.f1.pdf [file research.0212.f1.pdf]

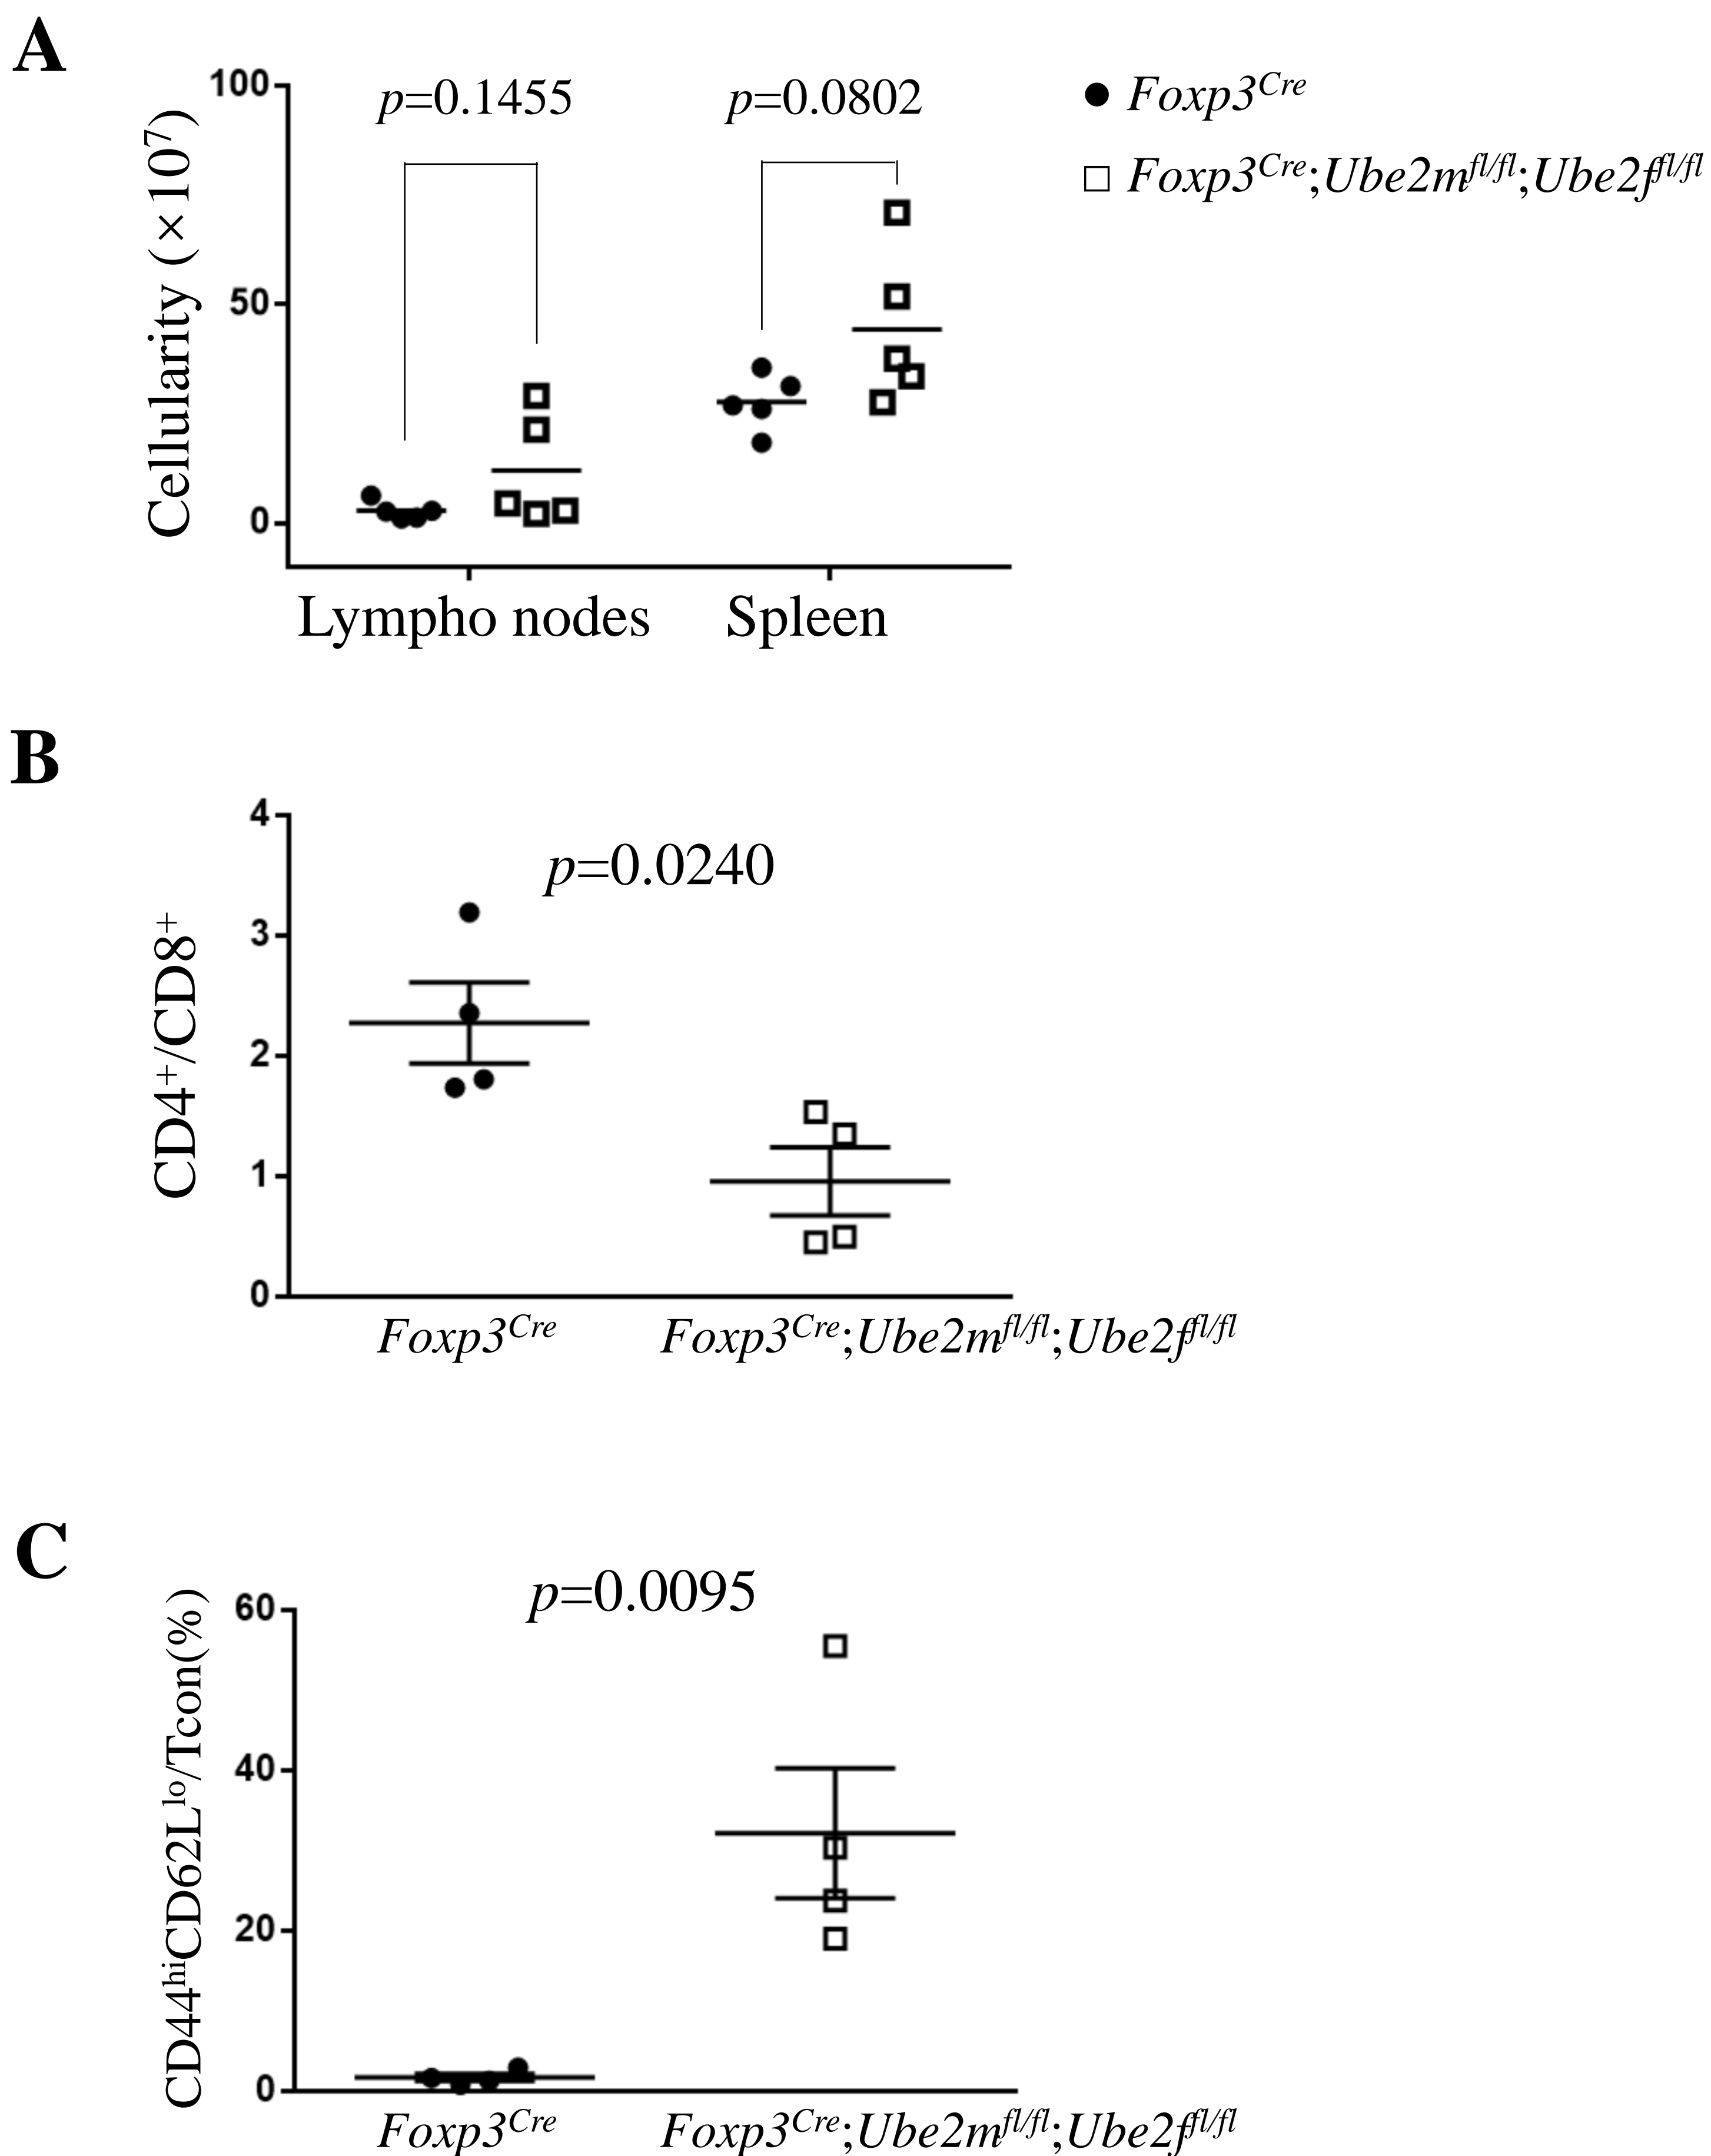

**Fig. S1. Auto-immune disorders in *Foxp3<sup>Cre</sup>;Ube2m<sup>fl/fl</sup>;Ube2f<sup>1/fl</sup>* mice**

(A) Total cell numbers in peripheral lymph nodes and spleen from *Foxp3<sup>Cre</sup>* and *Foxp3<sup>Cre</sup>;Ube2m<sup>fl/fl</sup>;Ube2f<sup>1/fl</sup>* mice (p19-21,  $n=5$ ).

(B) CD4<sup>+</sup>/CD8<sup>+</sup> ratios in peripheral lymph nodes from *Foxp3<sup>Cre</sup>* and *Foxp3<sup>Cre</sup>;Ube2m<sup>fl/fl</sup>;Ube2f<sup>1/fl</sup>* mice (p19-21,  $n=5$ ).

(C) The proportion of CD44<sup>hi</sup>CD62L<sup>lo</sup> effector/memory cells among Tcon cells in peripheral lymph nodes from *Foxp3<sup>Cre</sup>* and *Foxp3<sup>Cre</sup>;Ube2m<sup>fl/fl</sup>;Ube2f<sup>1/fl</sup>* mice (p19-21,  $n=5$ ).

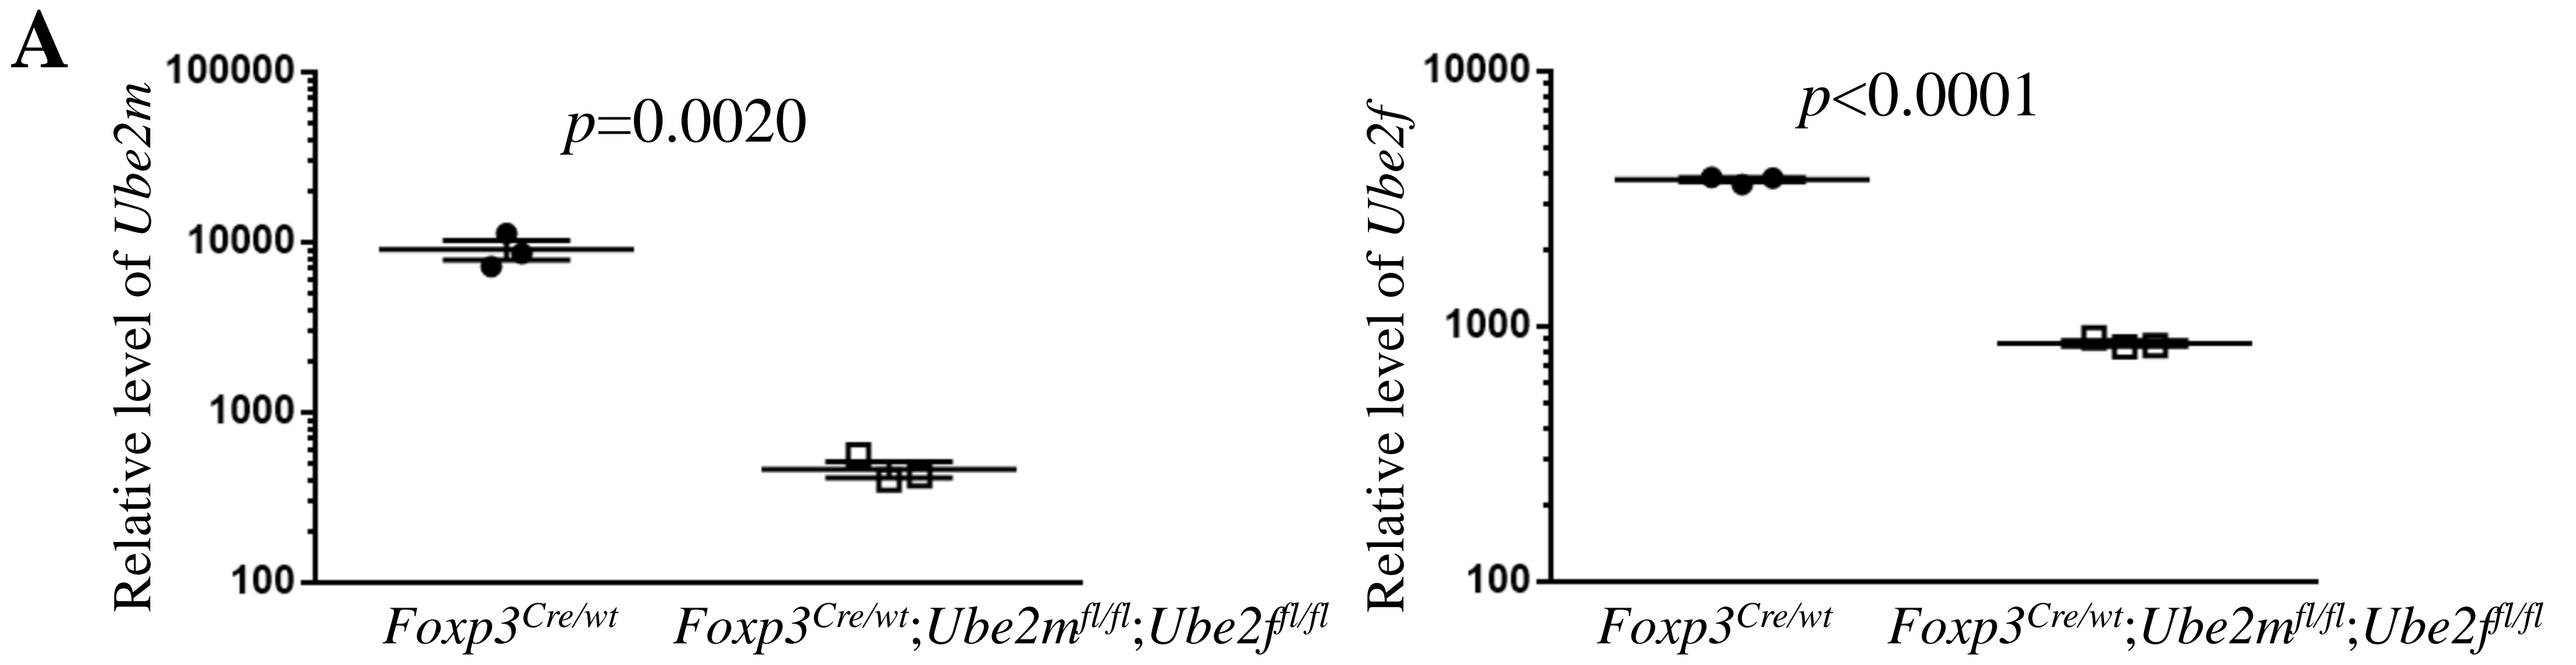

**B** *Ube2m*&*Ube2f*-deficient Treg cells v. s. *Foxp3<sup>Cre</sup>* Treg cells

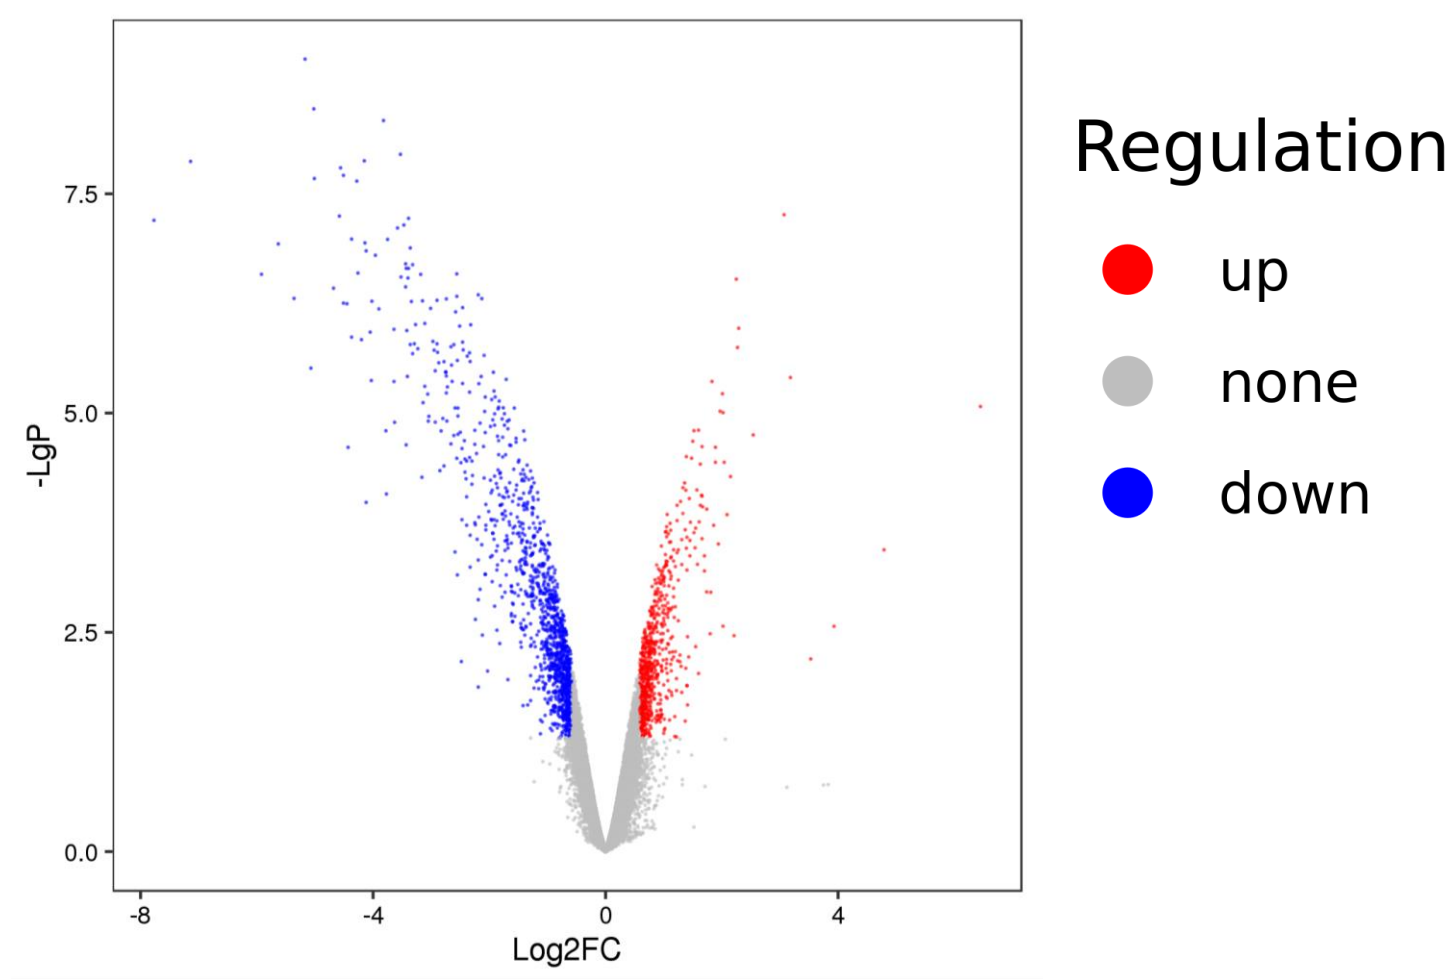

**C**

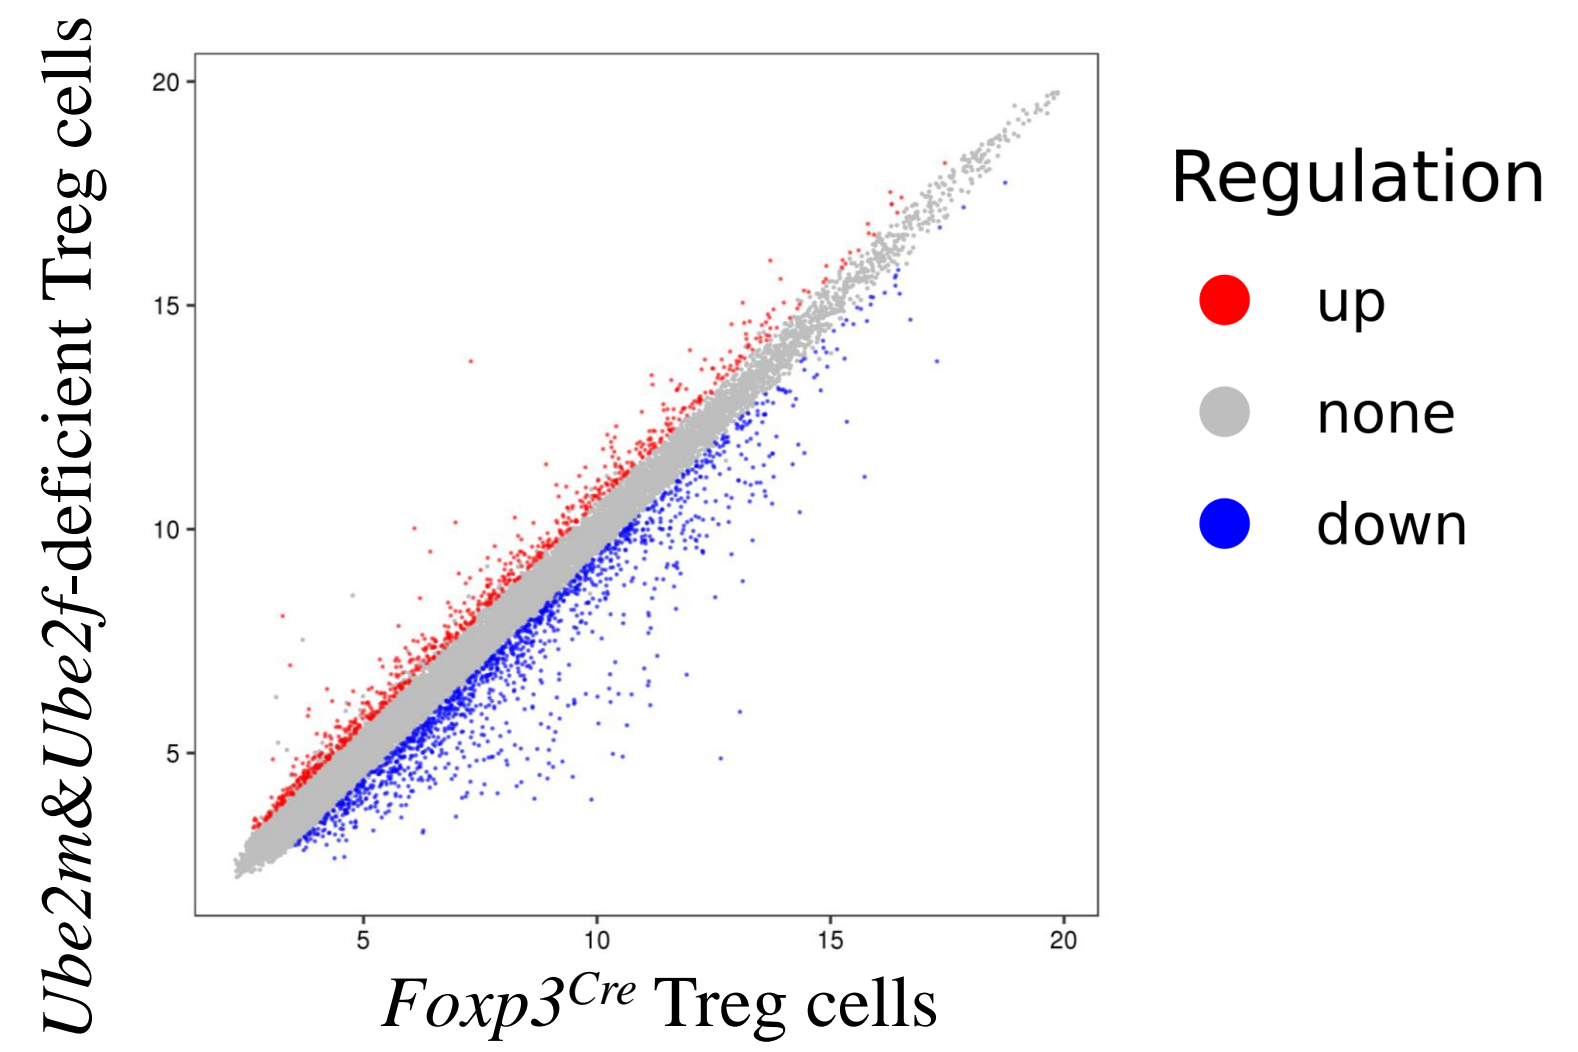

**D**

| Gene symbol          | <i>Foxp3<sup>Cre/wt</sup></i><br>(average, log2) | <i>Foxp3<sup>Cre/wt</sup>;Ube2m<sup>fl/fl</sup>;Ube2f<sup>1/fl</sup></i><br>(average, log2) | Fold change |
|----------------------|--------------------------------------------------|---------------------------------------------------------------------------------------------|-------------|
| <i>Gm11096</i>       | 7.30                                             | 13.75                                                                                       | 87.427      |
| <i>Ccl22</i>         | 3.27                                             | 8.06                                                                                        | 27.665      |
| <i>Jchain</i>        | 6.09                                             | 10.02                                                                                       | 15.242      |
| <i>Fscn1</i>         | 3.43                                             | 6.96                                                                                        | 11.551      |
| <i>Pde3b</i>         | 6.97                                             | 10.15                                                                                       | 9.063       |
| <i>Chil5</i>         | 6.43                                             | 9.50                                                                                        | 8.398       |
| <i>Itih5</i>         | 8.91                                             | 11.45                                                                                       | 5.816       |
| <i>Satb1</i>         | 13.71                                            | 16.0                                                                                        | 4.891       |
| <i>1700025G04Rik</i> | 11.17                                            | 13.44                                                                                       | 4.823       |
| <i>Cnn3</i>          | 6.21                                             | 8.46                                                                                        | 4.757       |
| <i>H2-M2</i>         | 4.22                                             | 6.43                                                                                        | 4.627       |
| <i>Ntn4</i>          | 3.83                                             | 5.98                                                                                        | 4.438       |
| <i>Adcy6</i>         | 5.75                                             | 7.84                                                                                        | 4.257       |
| <i>Parp8</i>         | 11.19                                            | 13.23                                                                                       | 4.112       |
| <i>Atp1b1</i>        | 8.24                                             | 10.26                                                                                       | 4.056       |
| <i>Apol7c</i>        | 3.81                                             | 5.83                                                                                        | 4.056       |
| <i>Actn1</i>         | 11.99                                            | 14.0                                                                                        | 4.028       |
| <i>Als2cl</i>        | 7.04                                             | 9.01                                                                                        | 3.918       |
| <i>Ly6c1</i>         | 13.12                                            | 15.06                                                                                       | 3.837       |
| <i>Pde4d</i>         | 10.41                                            | 12.3                                                                                        | 3.706       |

**E**

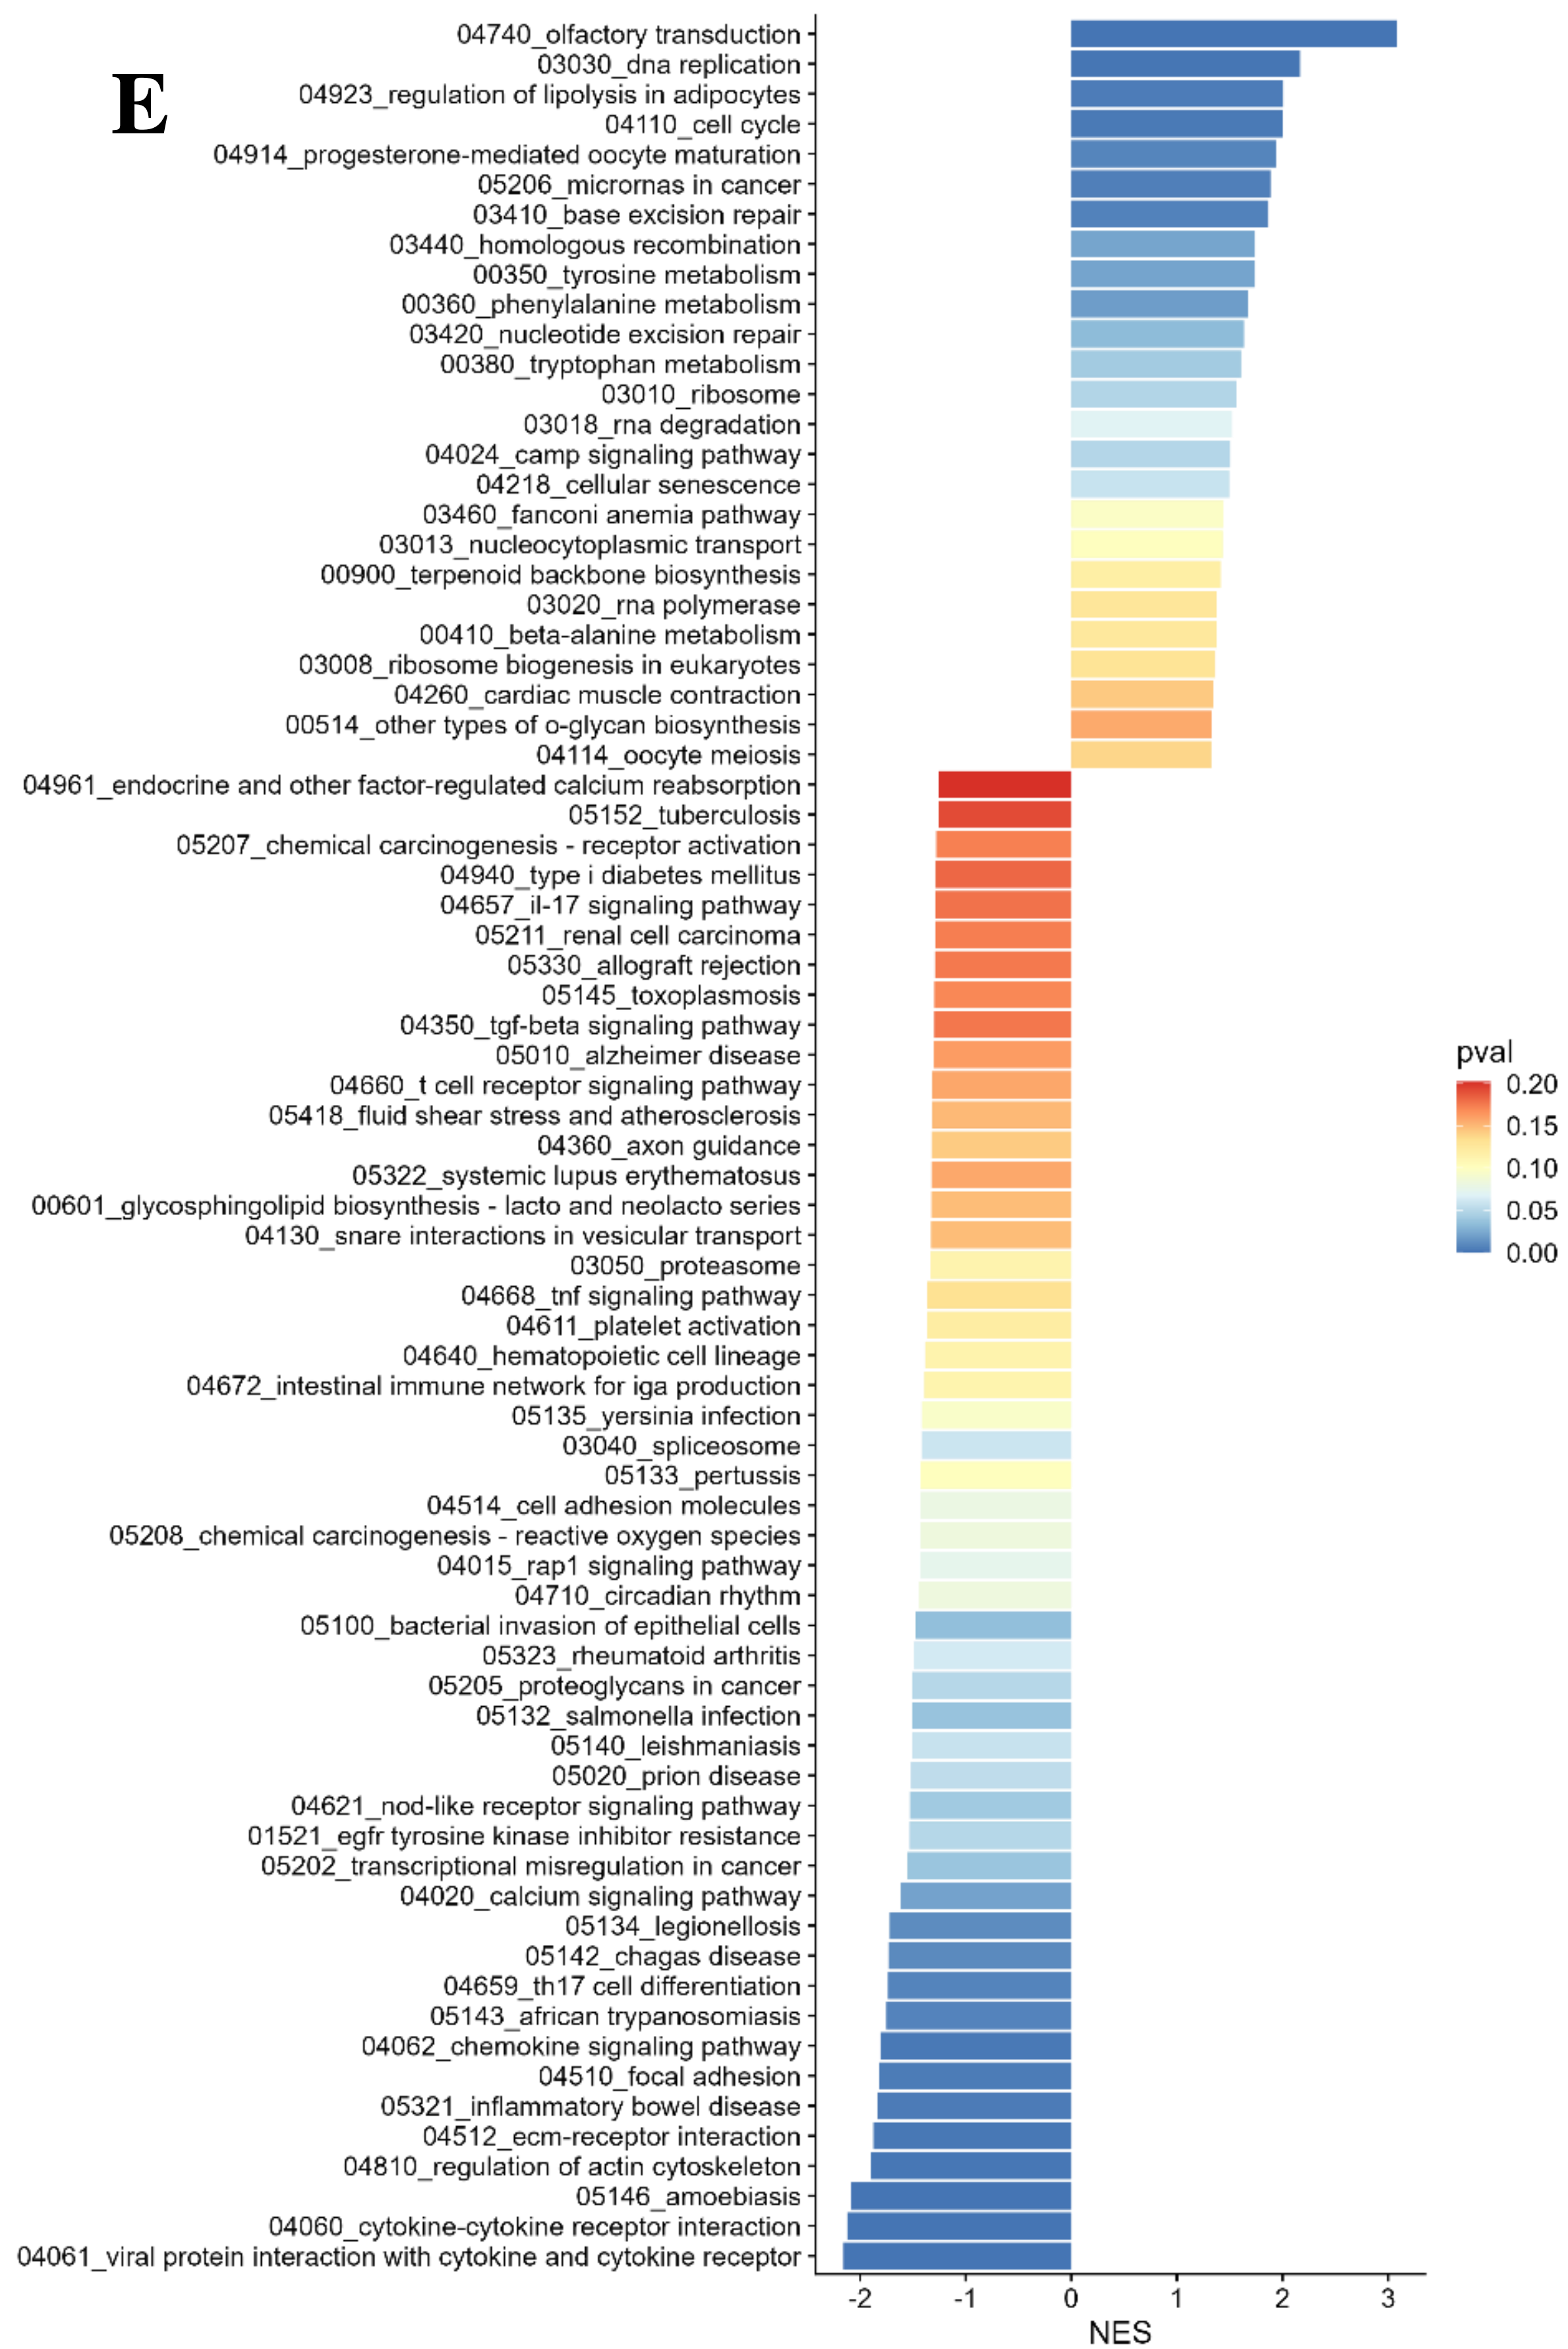

**F** Enrichment plot: 04659\_TH17 CELL DIFFERENTIATION

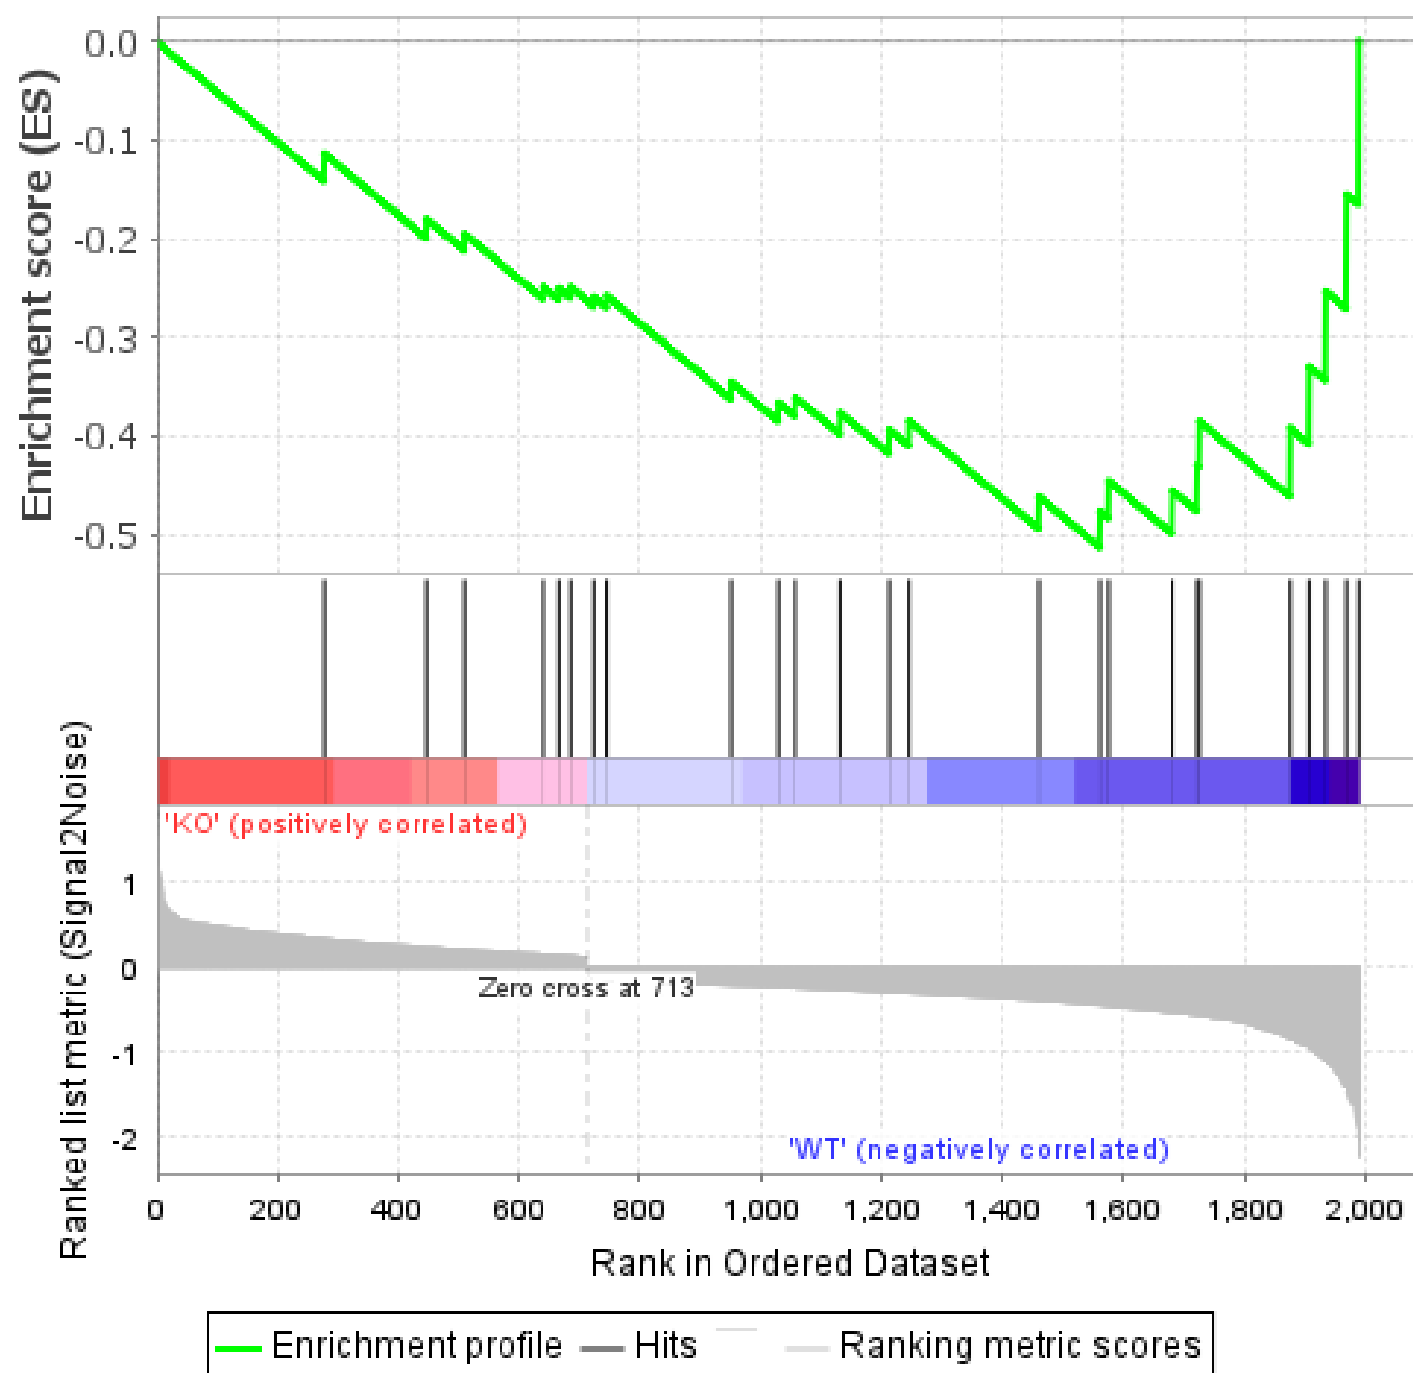



## Fig. S2. Transcriptional alterations in *Ube2m&Ube2f*-deficient Treg cells

- (A) Transcriptional profiling revealed dramatic decreased levels of *Ube2m* and *Ube2f* in *Ube2m&Ube2f*-deficient Treg cells.
- (B) Volcano plot of the transcriptional alterations in *Ube2m&Ube2f*-deficient Treg cells compared to the *Foxp3<sup>Cre</sup>* control Treg cells.
- (C) Scatter plot of the transcriptional programs revealed from *Ube2m&Ube2f*-deficient Treg cells compared to the *Foxp3<sup>Cre</sup>* control Treg cells.
- (D) Top 20 up-regulated genes in *Ube2m&Ube2f*-deficient Treg cells compared to the *Foxp3<sup>Cre</sup>* control Treg cells with alters more than 1.5-folds and  $p$ -values $<0.05$ .
- (E) GSEA pathway analysis of the transcriptional alterations in *Ube2m&Ube2f*-deficient Treg cells compared to the *Foxp3<sup>Cre</sup>* control Treg cells; genes with alterations more than 1.5-folds, with  $p$ -values $<0.05$  were selected.
- (F) Gene set enrichment analysis of T<sub>H</sub>17 cell differentiation genes in CD4<sup>+</sup>YFP<sup>+</sup> Treg cells from *Foxp3<sup>Cre/wt</sup>* and *Foxp3<sup>Cre/wt</sup>;Ube2m<sup>fl/fl</sup>;Ube2f<sup>fl/fl</sup>* mice, determined by transcriptional profiling with  $Fc>1.5$  and  $p<0.05$ .

**A**

| Gene symbol     | <i>Foxp3<sup>Cre/wt</sup></i><br>(average, log2) | <i>Foxp3<sup>Cre/wt;Ube2<sup>m<sup>fl/fl</sup>;Ube2<sup>fl/fl</sup></sup></sup></i><br>(average, log2) | Fold change |
|-----------------|--------------------------------------------------|--------------------------------------------------------------------------------------------------------|-------------|
| <i>Gm3706</i>   | 5.98                                             | 8.29                                                                                                   | 4.946       |
| <i>Gm8127</i>   | 5.96                                             | 7.86                                                                                                   | 3.715       |
| <i>Gm3123</i>   | 4.77                                             | 6.59                                                                                                   | 3.529       |
| <i>Spi1</i>     | 4.93                                             | 6.70                                                                                                   | 3.400       |
| <i>Vmn2r96</i>  | 8.01                                             | 9.45                                                                                                   | 2.732       |
| <i>Rapgef4</i>  | 7.01                                             | 8.40                                                                                                   | 2.626       |
| <i>Gm7980</i>   | 4.84                                             | 6.18                                                                                                   | 2.528       |
| <i>Vmn1r114</i> | 5.61                                             | 6.94                                                                                                   | 2.507       |
| <i>Gm10922</i>  | 4.97                                             | 6.24                                                                                                   | 2.417       |
| <i>Ubp2</i>     | 10.63                                            | 11.81                                                                                                  | 2.271       |
| <i>Klf7</i>     | 9.62                                             | 10.79                                                                                                  | 2.261       |
| <i>St8sia1</i>  | 10.79                                            | 11.95                                                                                                  | 2.227       |
| <i>Bub1b</i>    | 5.32                                             | 6.48                                                                                                   | 2.223       |
| <i>Gm2046</i>   | 6.30                                             | 7.43                                                                                                   | 2.193       |
| <i>Dgke</i>     | 5.61                                             | 6.73                                                                                                   | 2.175       |
| <i>Hells</i>    | 6.54                                             | 7.65                                                                                                   | 2.170       |
| <i>Pcdh7</i>    | 3.53                                             | 4.65                                                                                                   | 2.170       |
| <i>Adck5</i>    | 6.18                                             | 7.28                                                                                                   | 2.138       |
| <i>Smad7</i>    | 9.82                                             | 10.90                                                                                                  | 2.126       |
| <i>Armcx1</i>   | 4.03                                             | 5.09                                                                                                   | 2.084       |

**B**

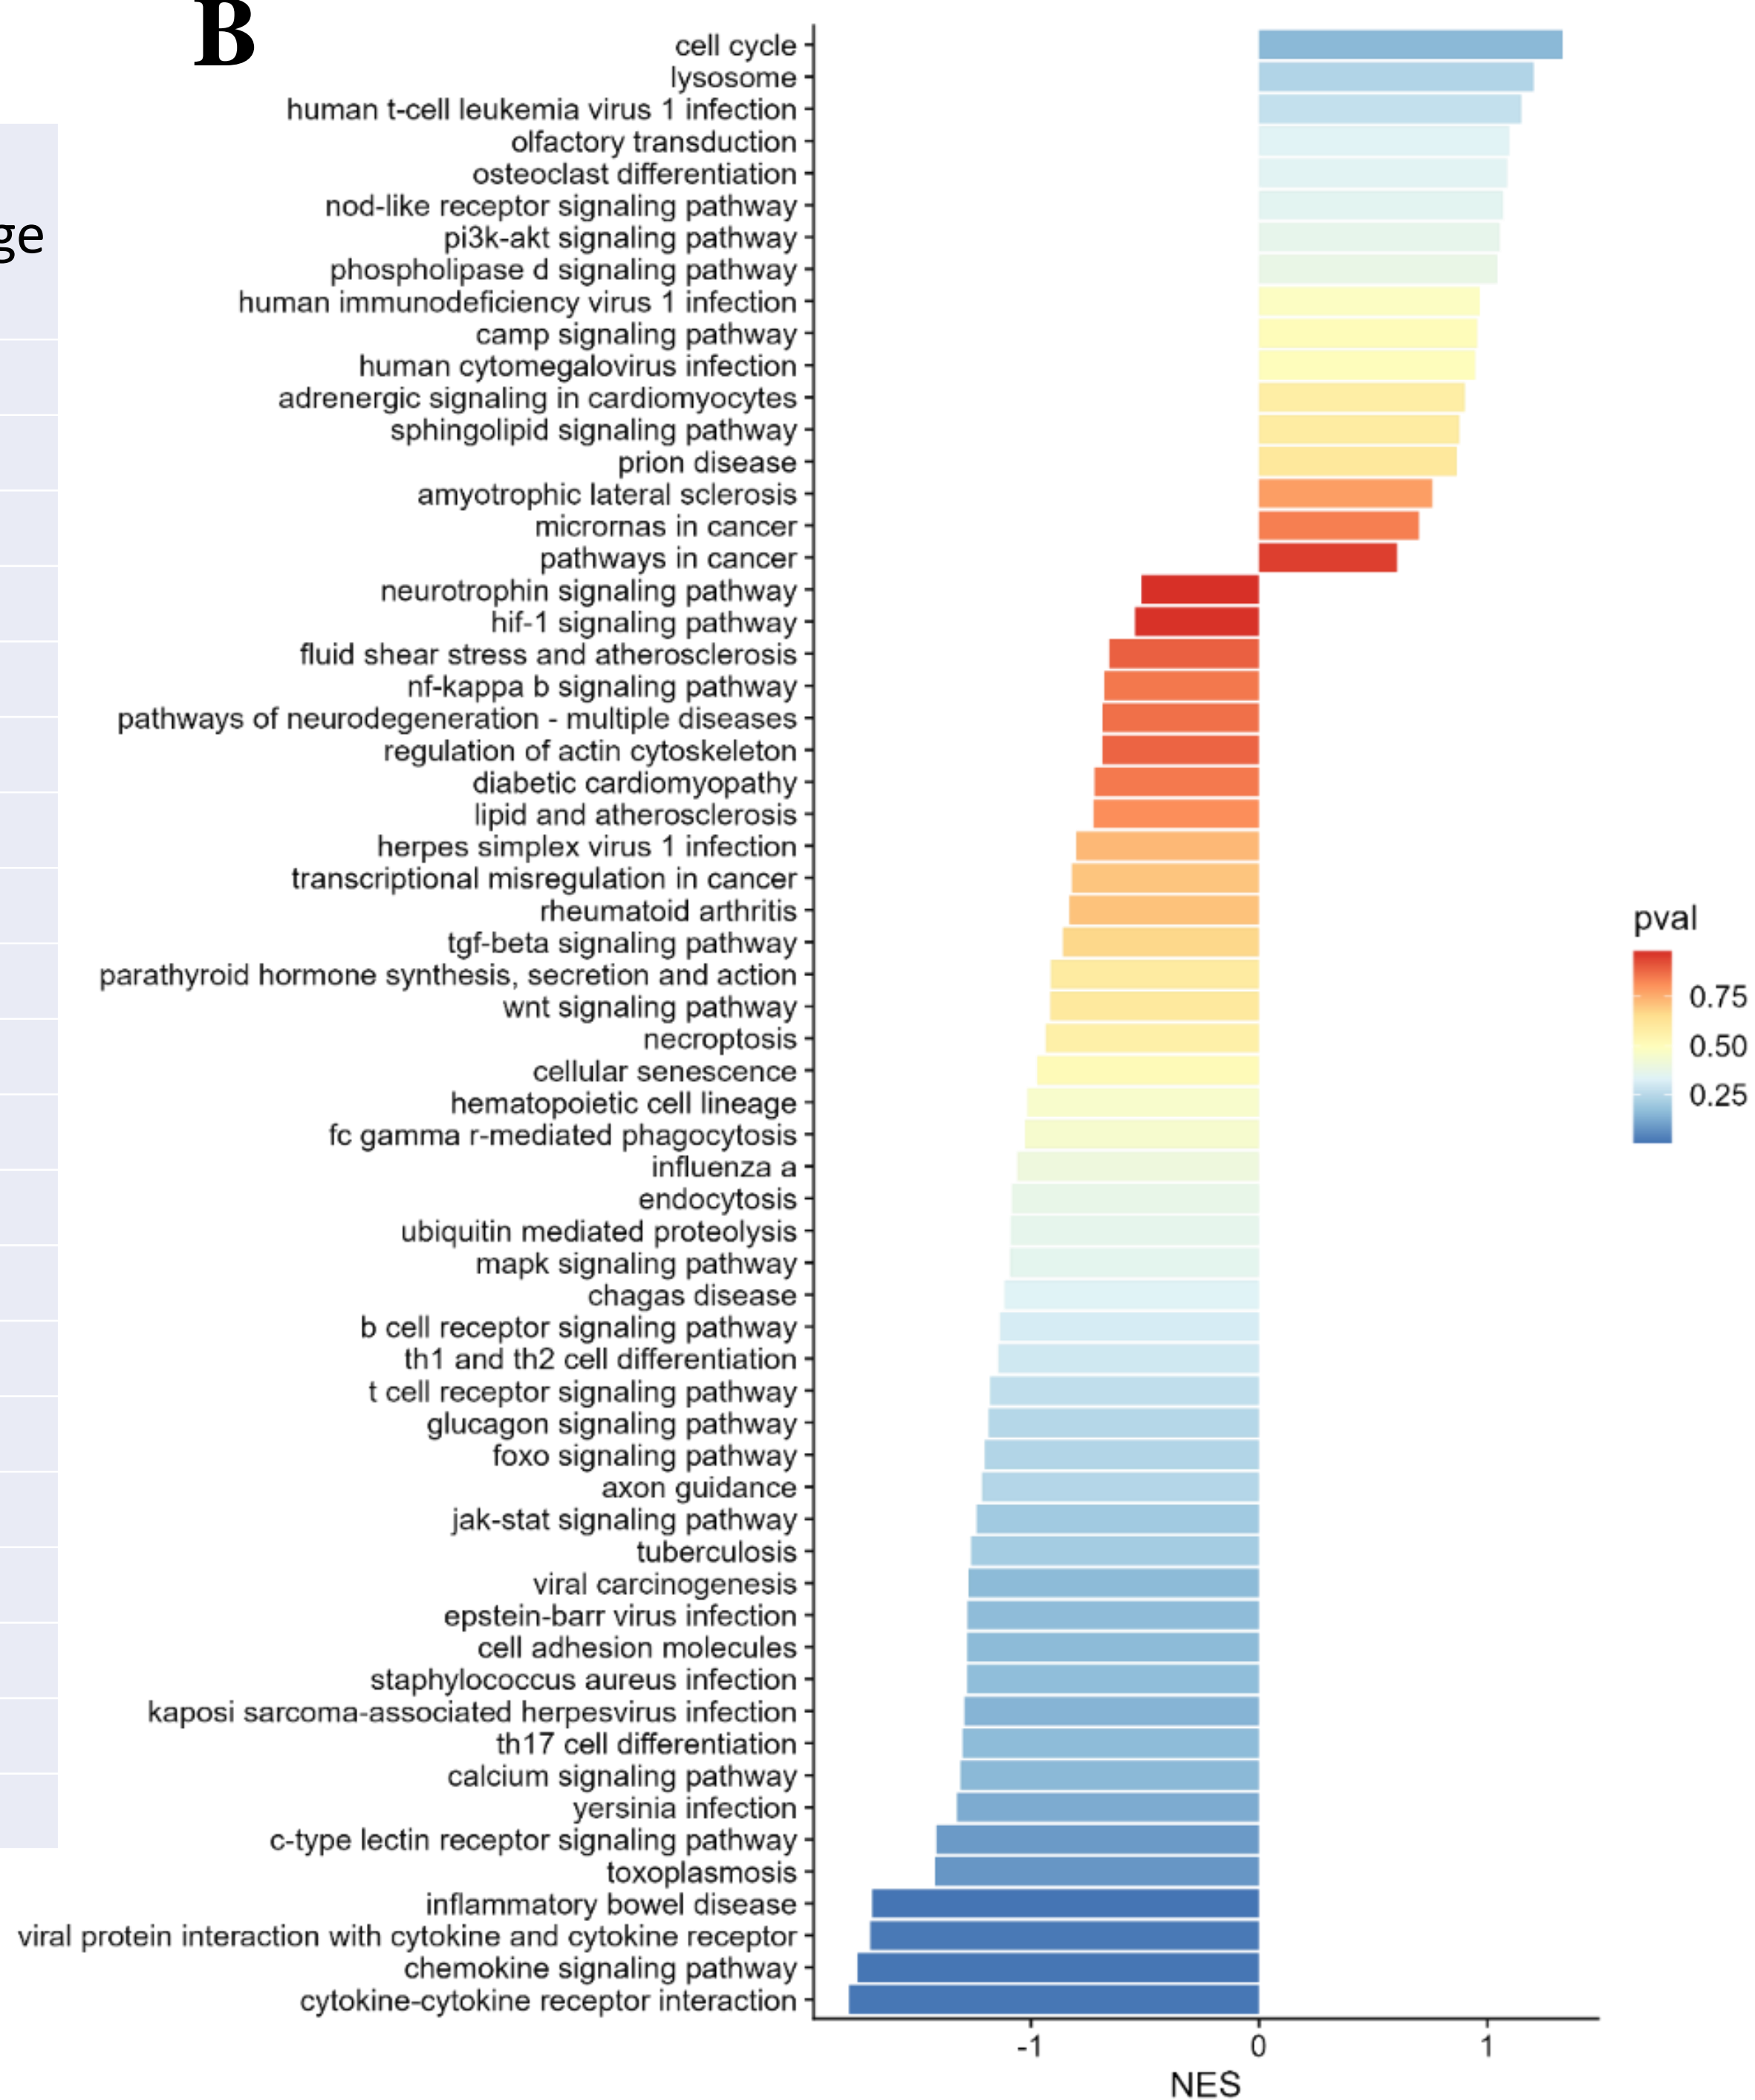

**C**

**Enrichment plot: 04659\_TH17 CELL DIFFERENTIATION**

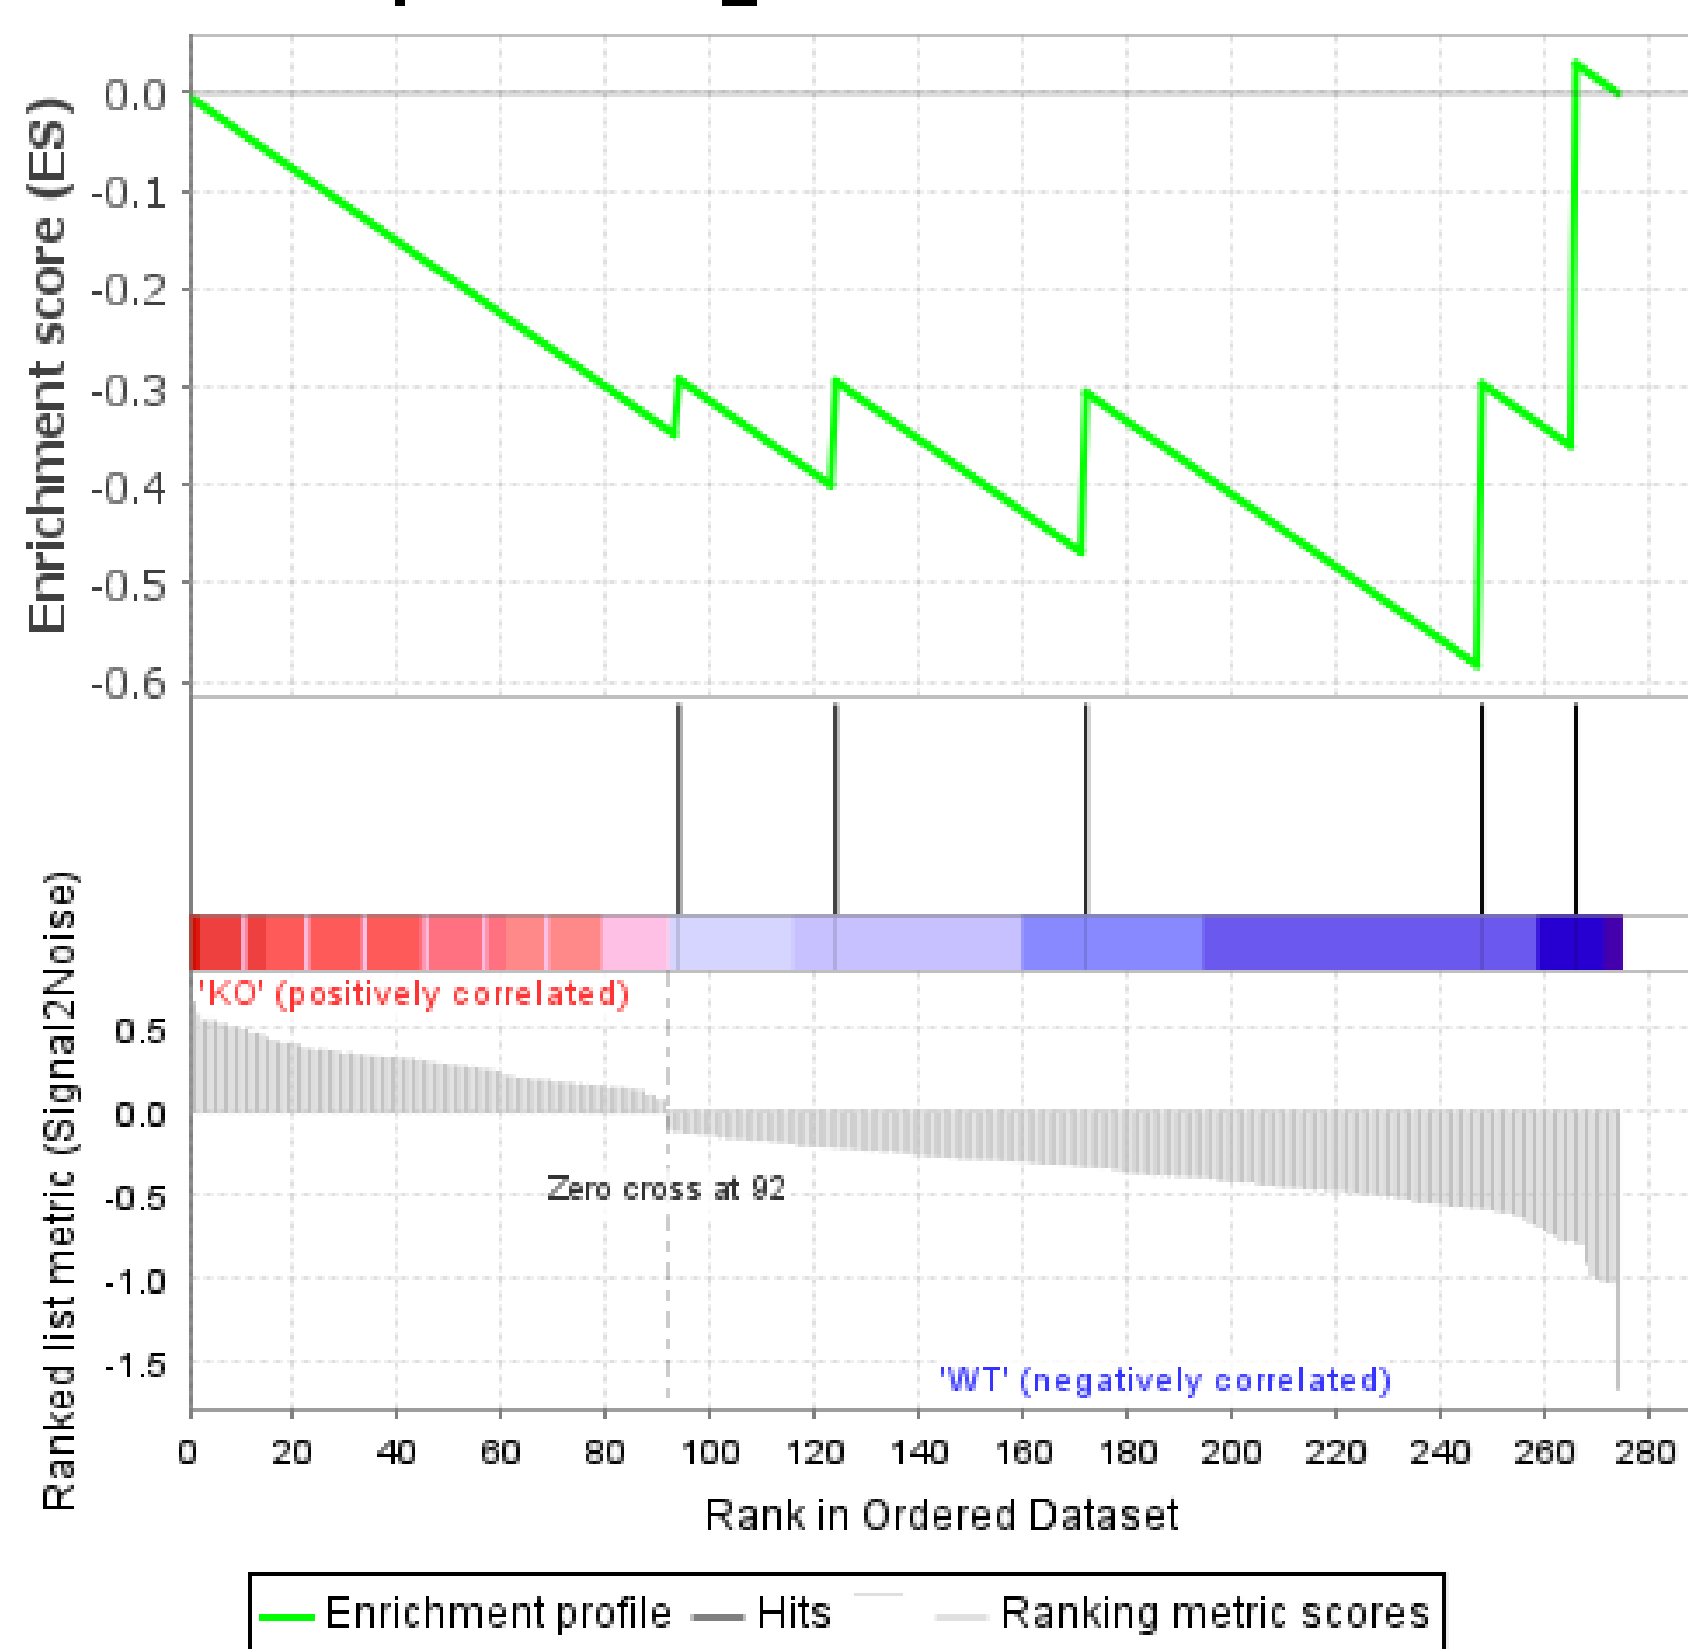

**D**

**Enrichment plot: 04142\_LYSOSOME**

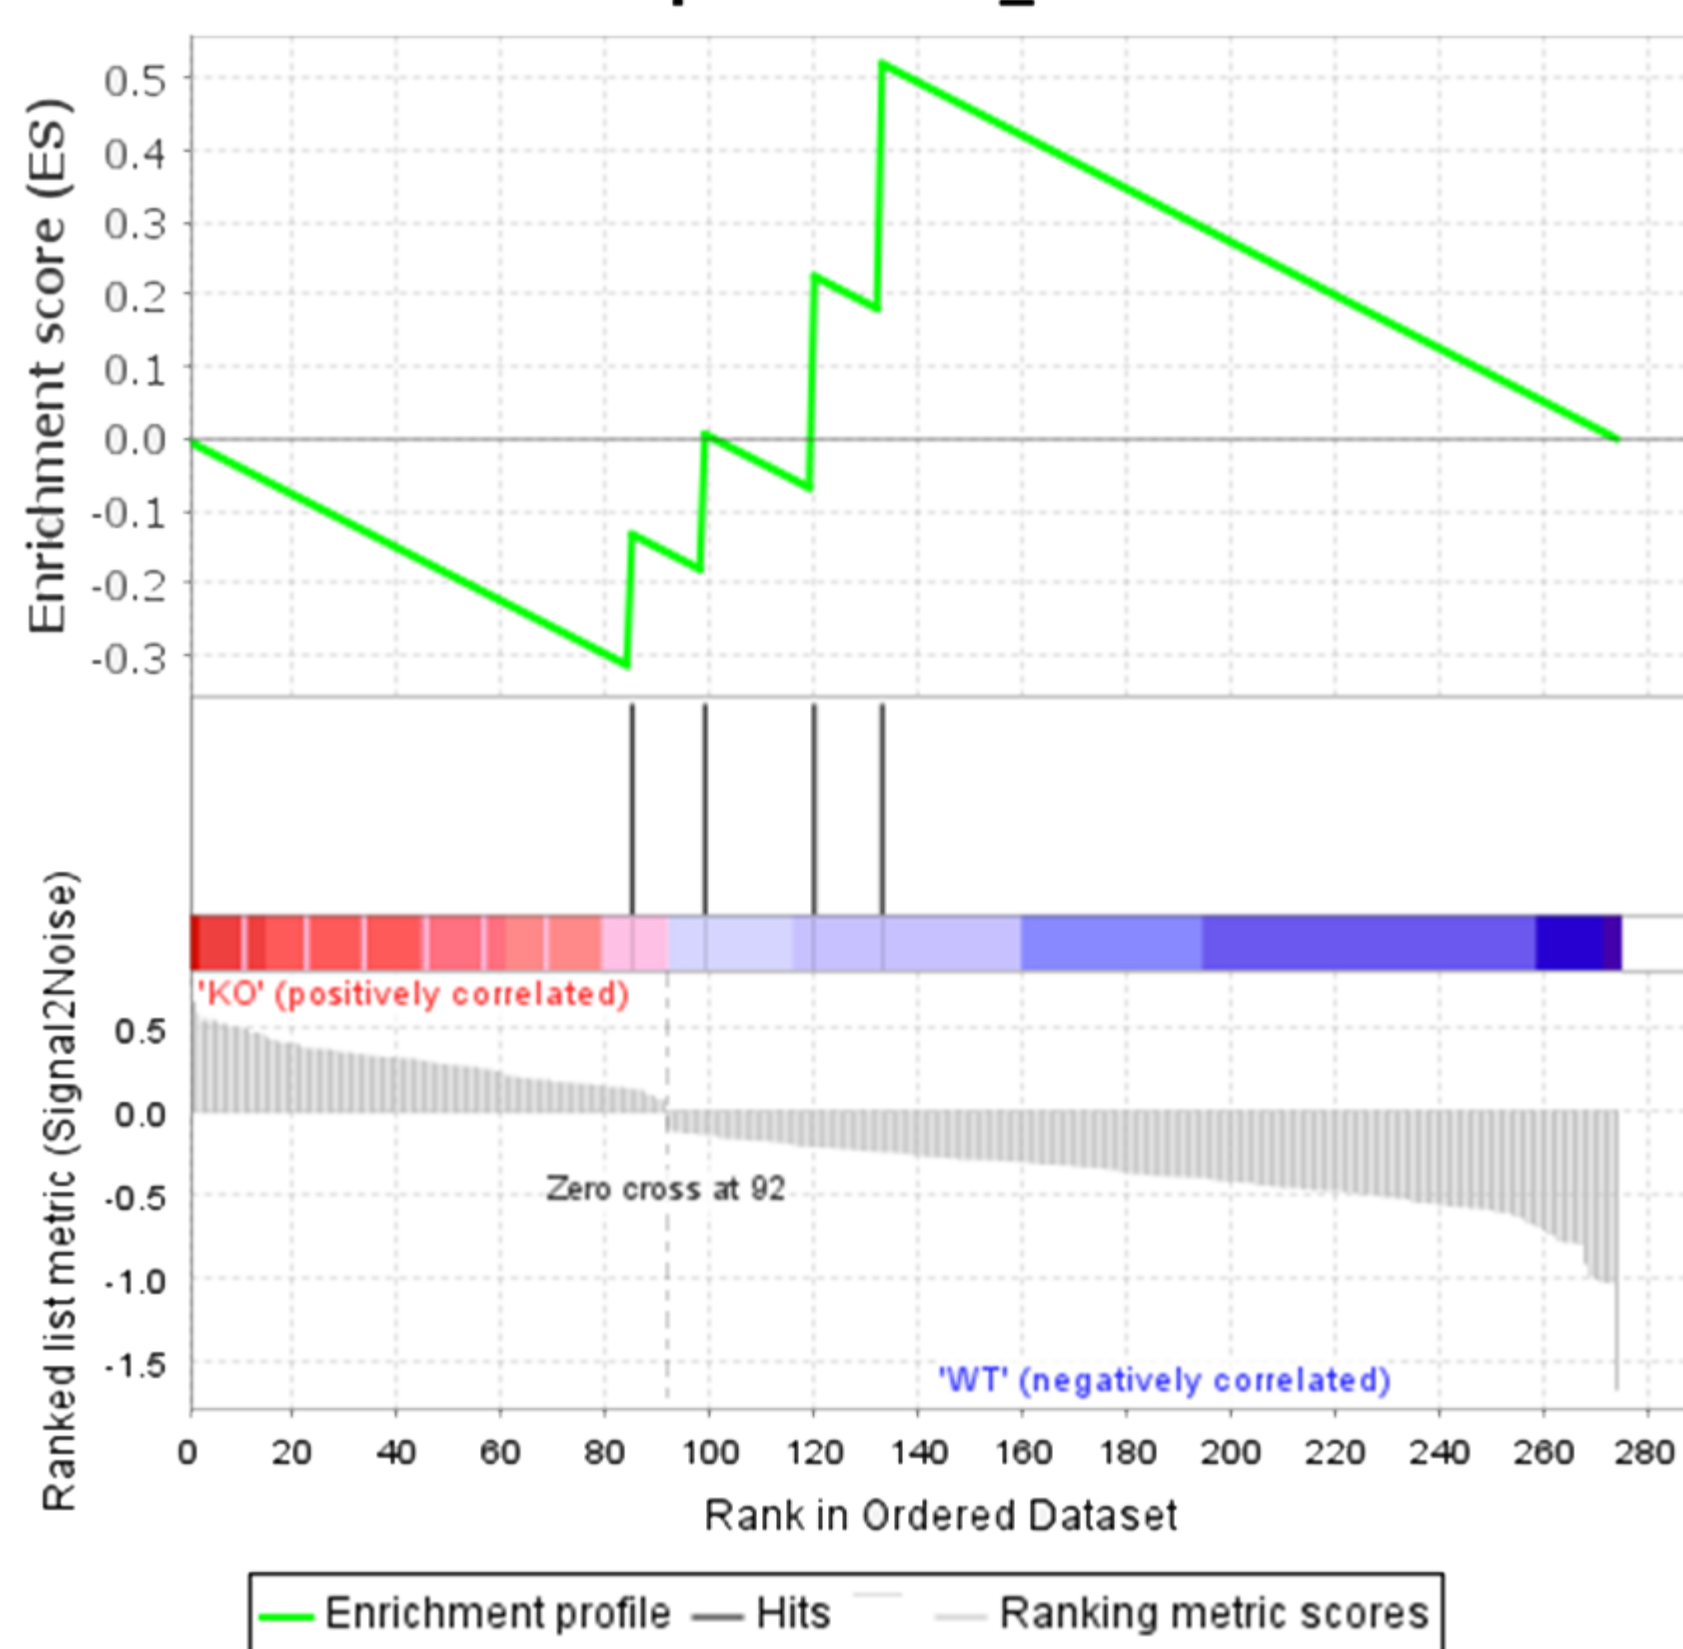

**Fig. S3. GSEA pathway analysis of genes altered in *Ube2m&Ube2f*-deficient, but not *Ube2m*-deficient Treg cells**

(A) Top 20 up-regulated genes in *Ube2m&Ube2f*-deficient, but not *Ube2m*-deficient, Treg cells.

(B) GSEA pathway analysis of genes altered in *Ube2m&Ube2f*-deficient, but not *Ube2m*-deficient Treg cells.

(C) Gene set enrichment analysis of T<sub>H</sub>17 cell differentiation genes in genes altered in *Ube2m&Ube2f*-deficient, but not *Ube2m*-deficient Treg cells.

(D) Gene set enrichment analysis of lysosome genes in genes altered in *Ube2m&Ube2f*-deficient, but not *Ube2m*-deficient Treg cells.



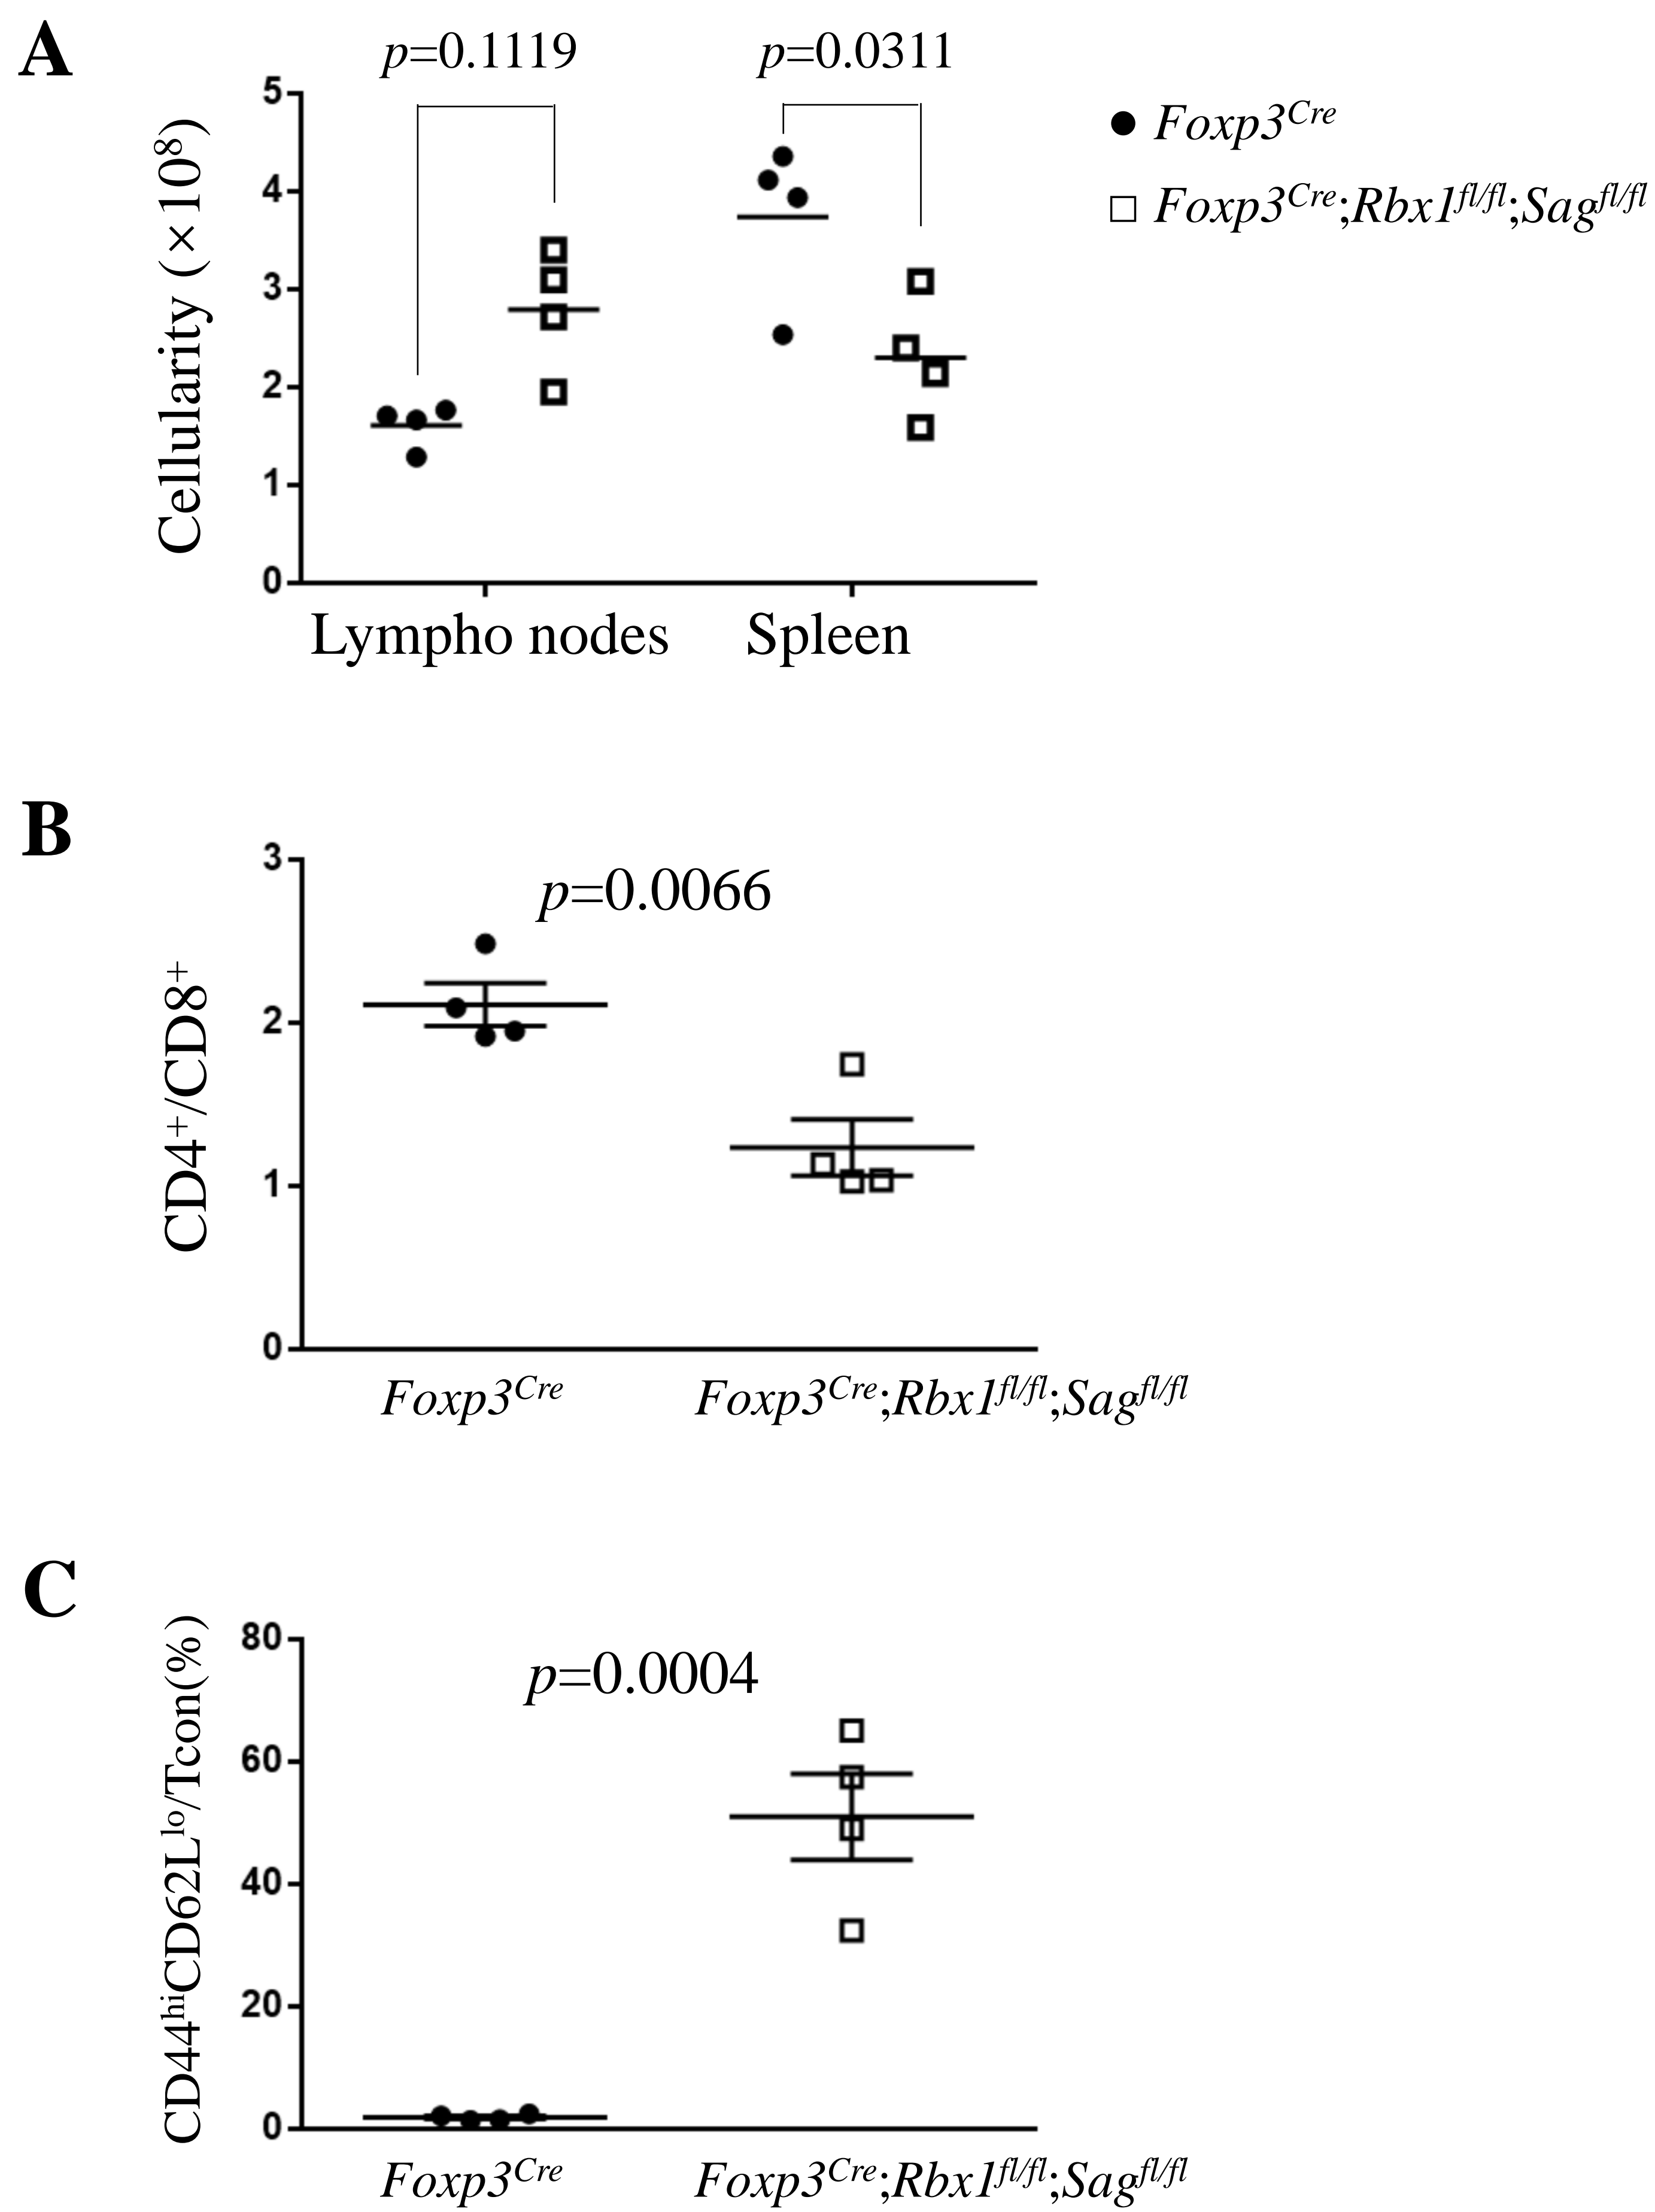

**Fig. S4. Auto-immune disorders in *Foxp3<sup>Cre</sup>;Rbx1<sup>fl/fl</sup>;Sag<sup>fl/fl</sup>* mice**

- (A) Total cell numbers in peripheral lymph nodes and spleen from *Foxp3<sup>Cre</sup>* and *Foxp3<sup>Cre</sup>;Rbx1<sup>fl/fl</sup>;Sag<sup>fl/fl</sup>* mice (p19-20,  $n=4$ ).
- (B) CD4<sup>+</sup>/CD8<sup>+</sup> ratios in peripheral lymph nodes from *Foxp3<sup>Cre</sup>* and *Foxp3<sup>Cre</sup>;Rbx1<sup>fl/fl</sup>;Sag<sup>fl/fl</sup>* mice (p19-20,  $n=4$ ).
- (C) The proportion of CD44<sup>hi</sup>CD62L<sup>lo</sup> effector/memory cells among Tcon cells in peripheral lymph nodes from *Foxp3<sup>Cre</sup>* and *Foxp3<sup>Cre</sup>;Rbx1<sup>fl/fl</sup>;Sag<sup>fl/fl</sup>* mice (p19-20,  $n=4$ ).

**A**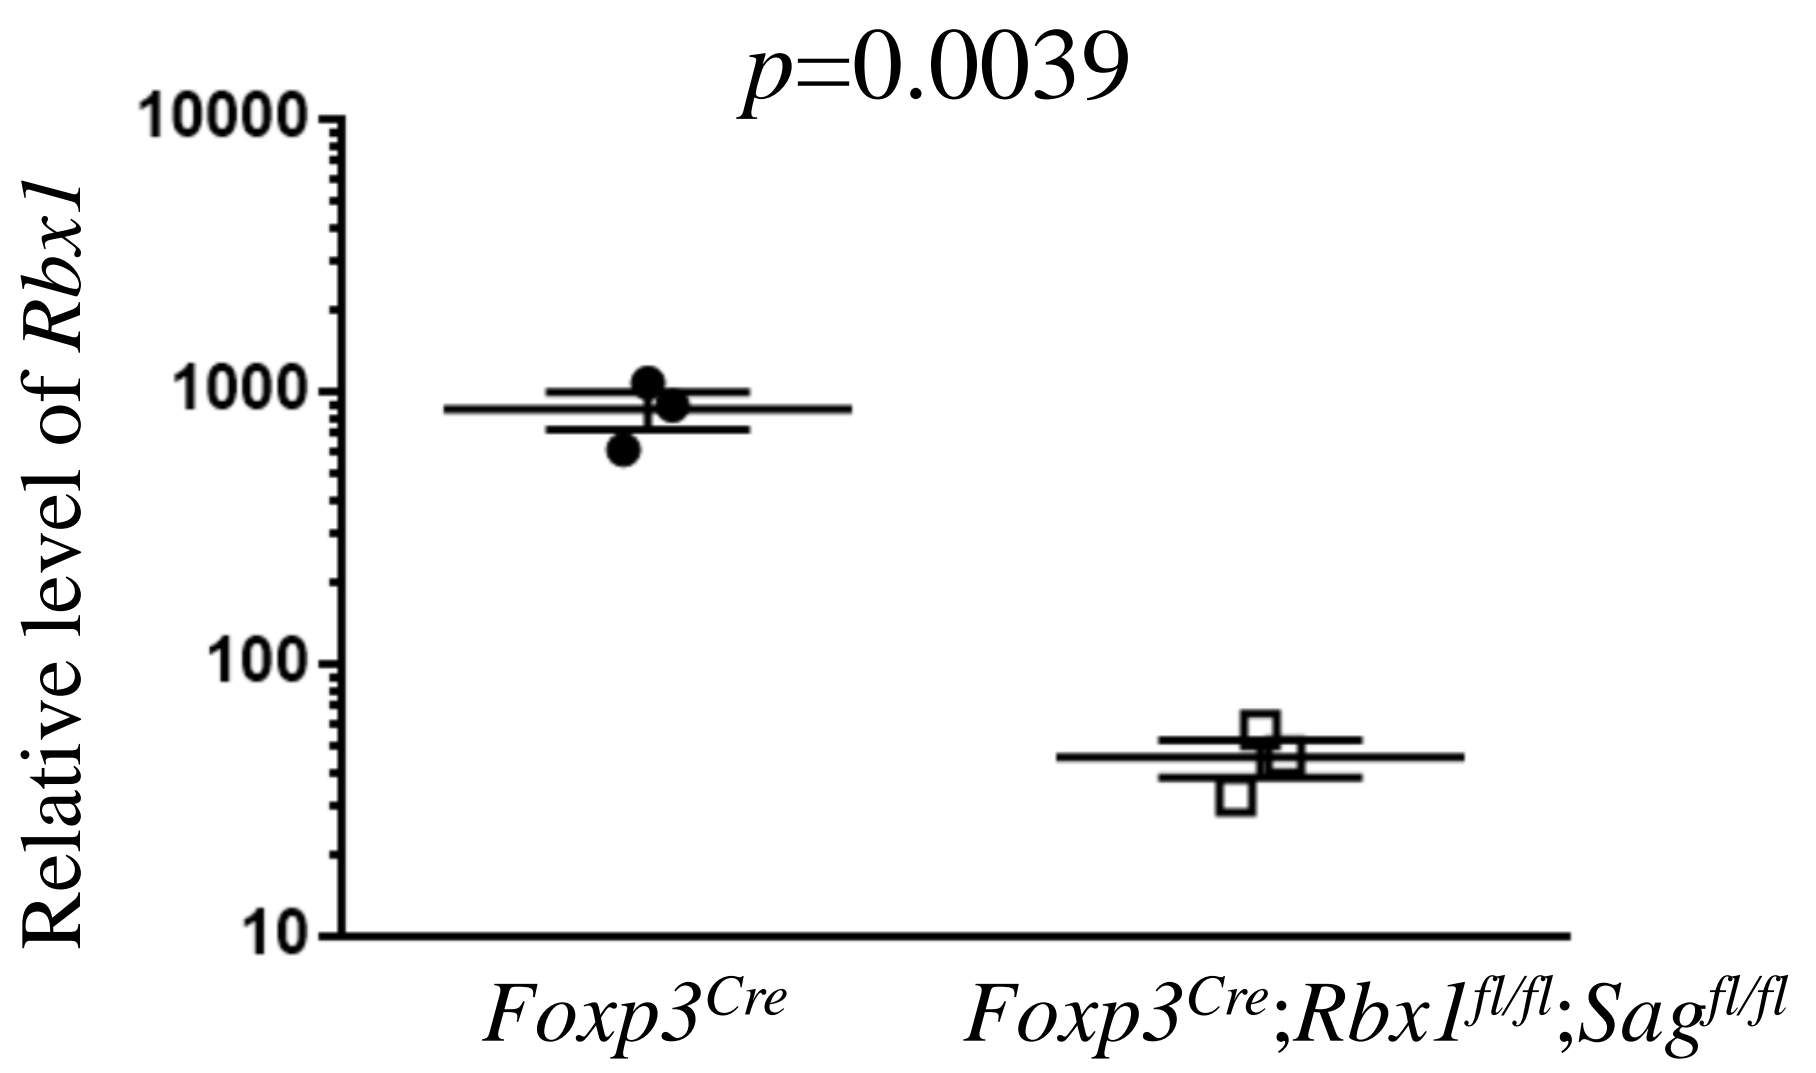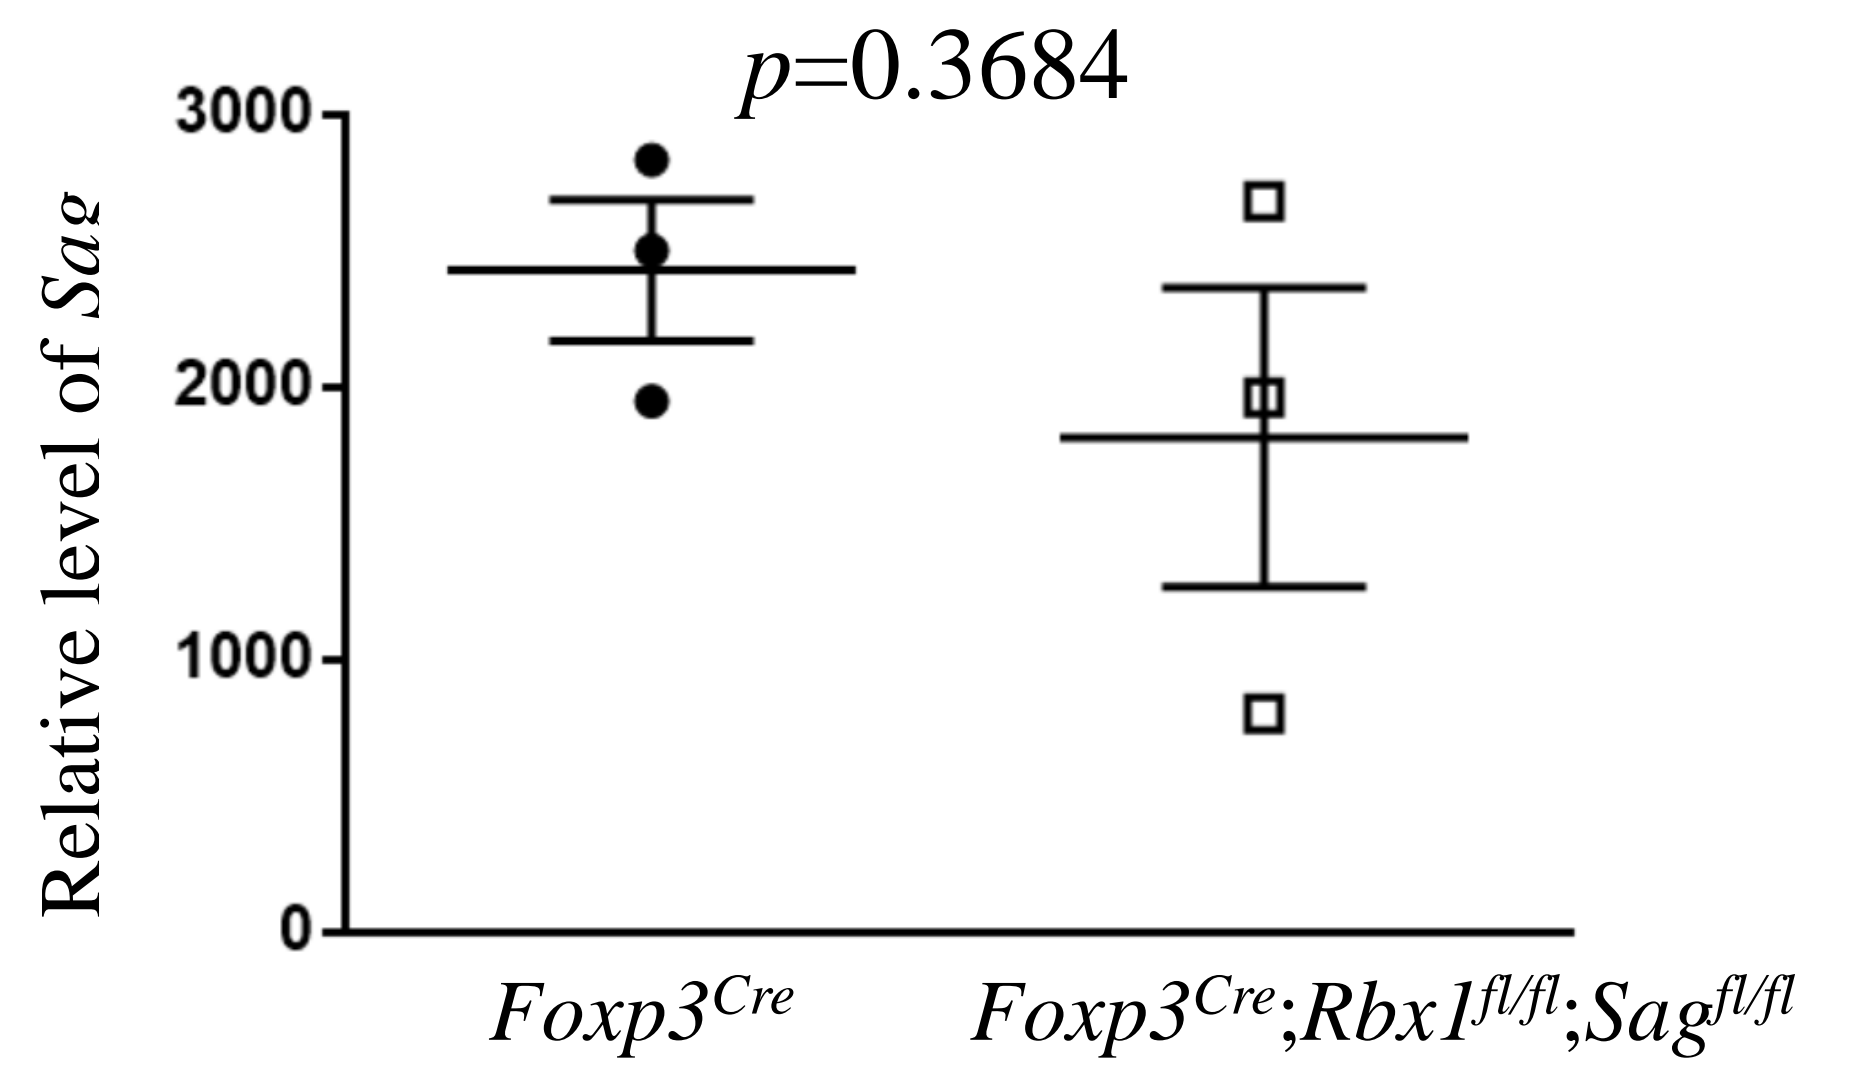**B**

*Rbx1*&*Sag*-deficient Treg cells v. s. *Foxp3<sup>Cre</sup>* Treg cells

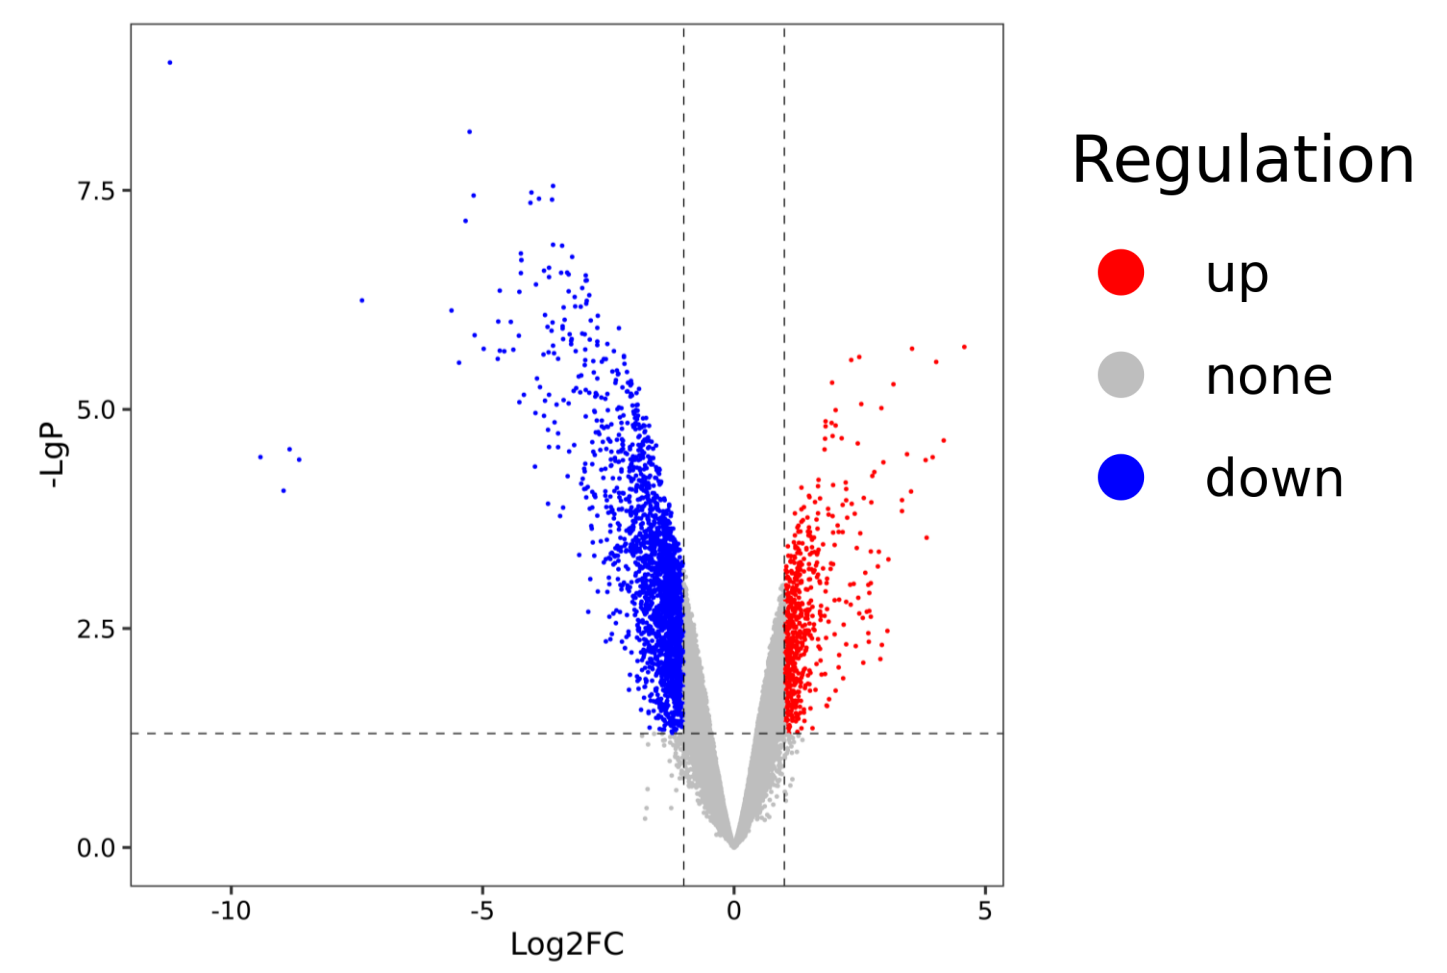**C**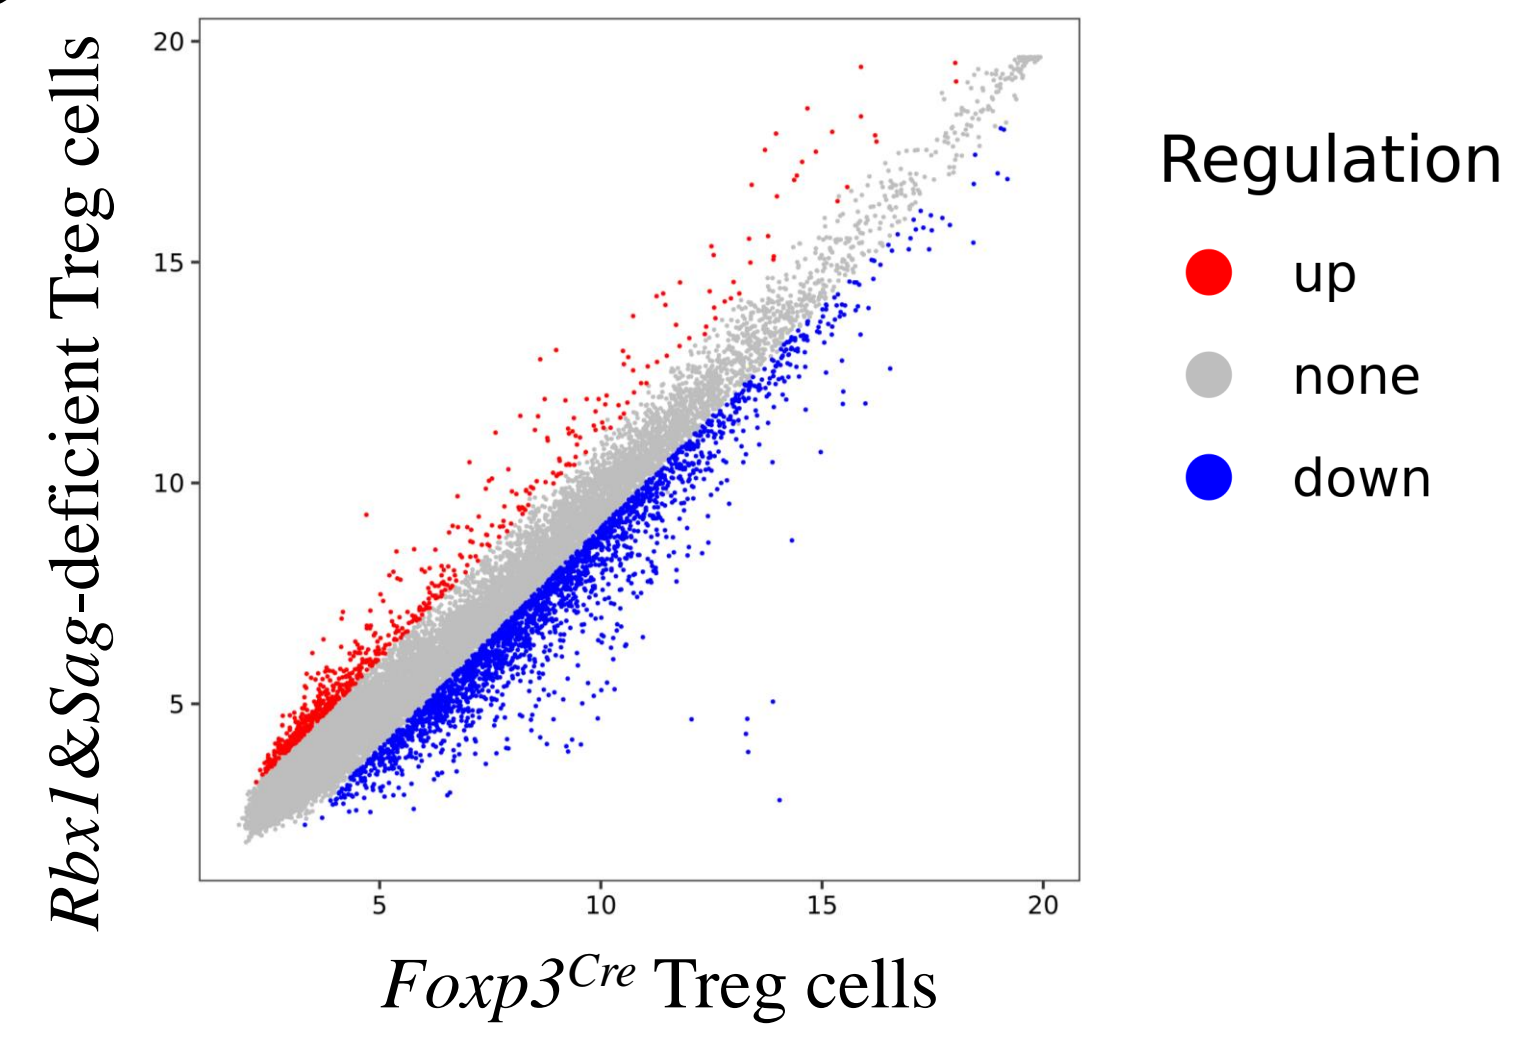**D**

| Gene symbol     | <i>Foxp3<sup>Cre</sup>/wt</i><br>(average, log2) | <i>Foxp3<sup>Cre</sup>/wt;Rbx1<sup>fl/fl</sup>;Sag<sup>fl/fl</sup></i><br>(average, log2) | Fold change |
|-----------------|--------------------------------------------------|-------------------------------------------------------------------------------------------|-------------|
| <i>Plk2</i>     | 4.70                                             | 9.28                                                                                      | 23.918      |
| <i>Sik1</i>     | 8.63                                             | 12.8                                                                                      | 18.001      |
| <i>Nr4a2</i>    | 8.99                                             | 13.01                                                                                     | 16.223      |
| <i>Dusp10</i>   | 13.96                                            | 17.91                                                                                     | 15.455      |
| <i>Gm10715</i>  | 13.71                                            | 17.54                                                                                     | 14.221      |
| <i>Tnfaip3</i>  | 14.67                                            | 18.48                                                                                     | 14.026      |
| <i>ND6</i>      | 15.88                                            | 19.42                                                                                     | 11.632      |
| <i>Irs2</i>     | 7.62                                             | 11.14                                                                                     | 11.472      |
| <i>Ppp1r15a</i> | 7.03                                             | 10.47                                                                                     | 10.853      |
| <i>Csrnp1</i>   | 8.18                                             | 11.52                                                                                     | 10.126      |
| <i>Gm17535</i>  | 13.41                                            | 16.75                                                                                     | 10.126      |
| <i>Gm10382</i>  | 8.73                                             | 11.9                                                                                      | 9.000       |
| <i>Ets2</i>     | 5.38                                             | 8.45                                                                                      | 8.398       |
| <i>Zfand2a</i>  | 10.73                                            | 13.78                                                                                     | 8.282       |
| <i>Nr4a1</i>    | 11.26                                            | 14.23                                                                                     | 7.835       |
| <i>Arrdc3</i>   | 6.76                                             | 9.70                                                                                      | 7.674       |
| <i>Gm11175</i>  | 8.58                                             | 11.51                                                                                     | 7.621       |
| <i>Gm17651</i>  | 4.17                                             | 7.08                                                                                      | 7.516       |
| <i>Dnajb9</i>   | 11.41                                            | 14.29                                                                                     | 7.362       |
| <i>Dusp5</i>    | 12.5                                             | 15.36                                                                                     | 7.260       |

**E**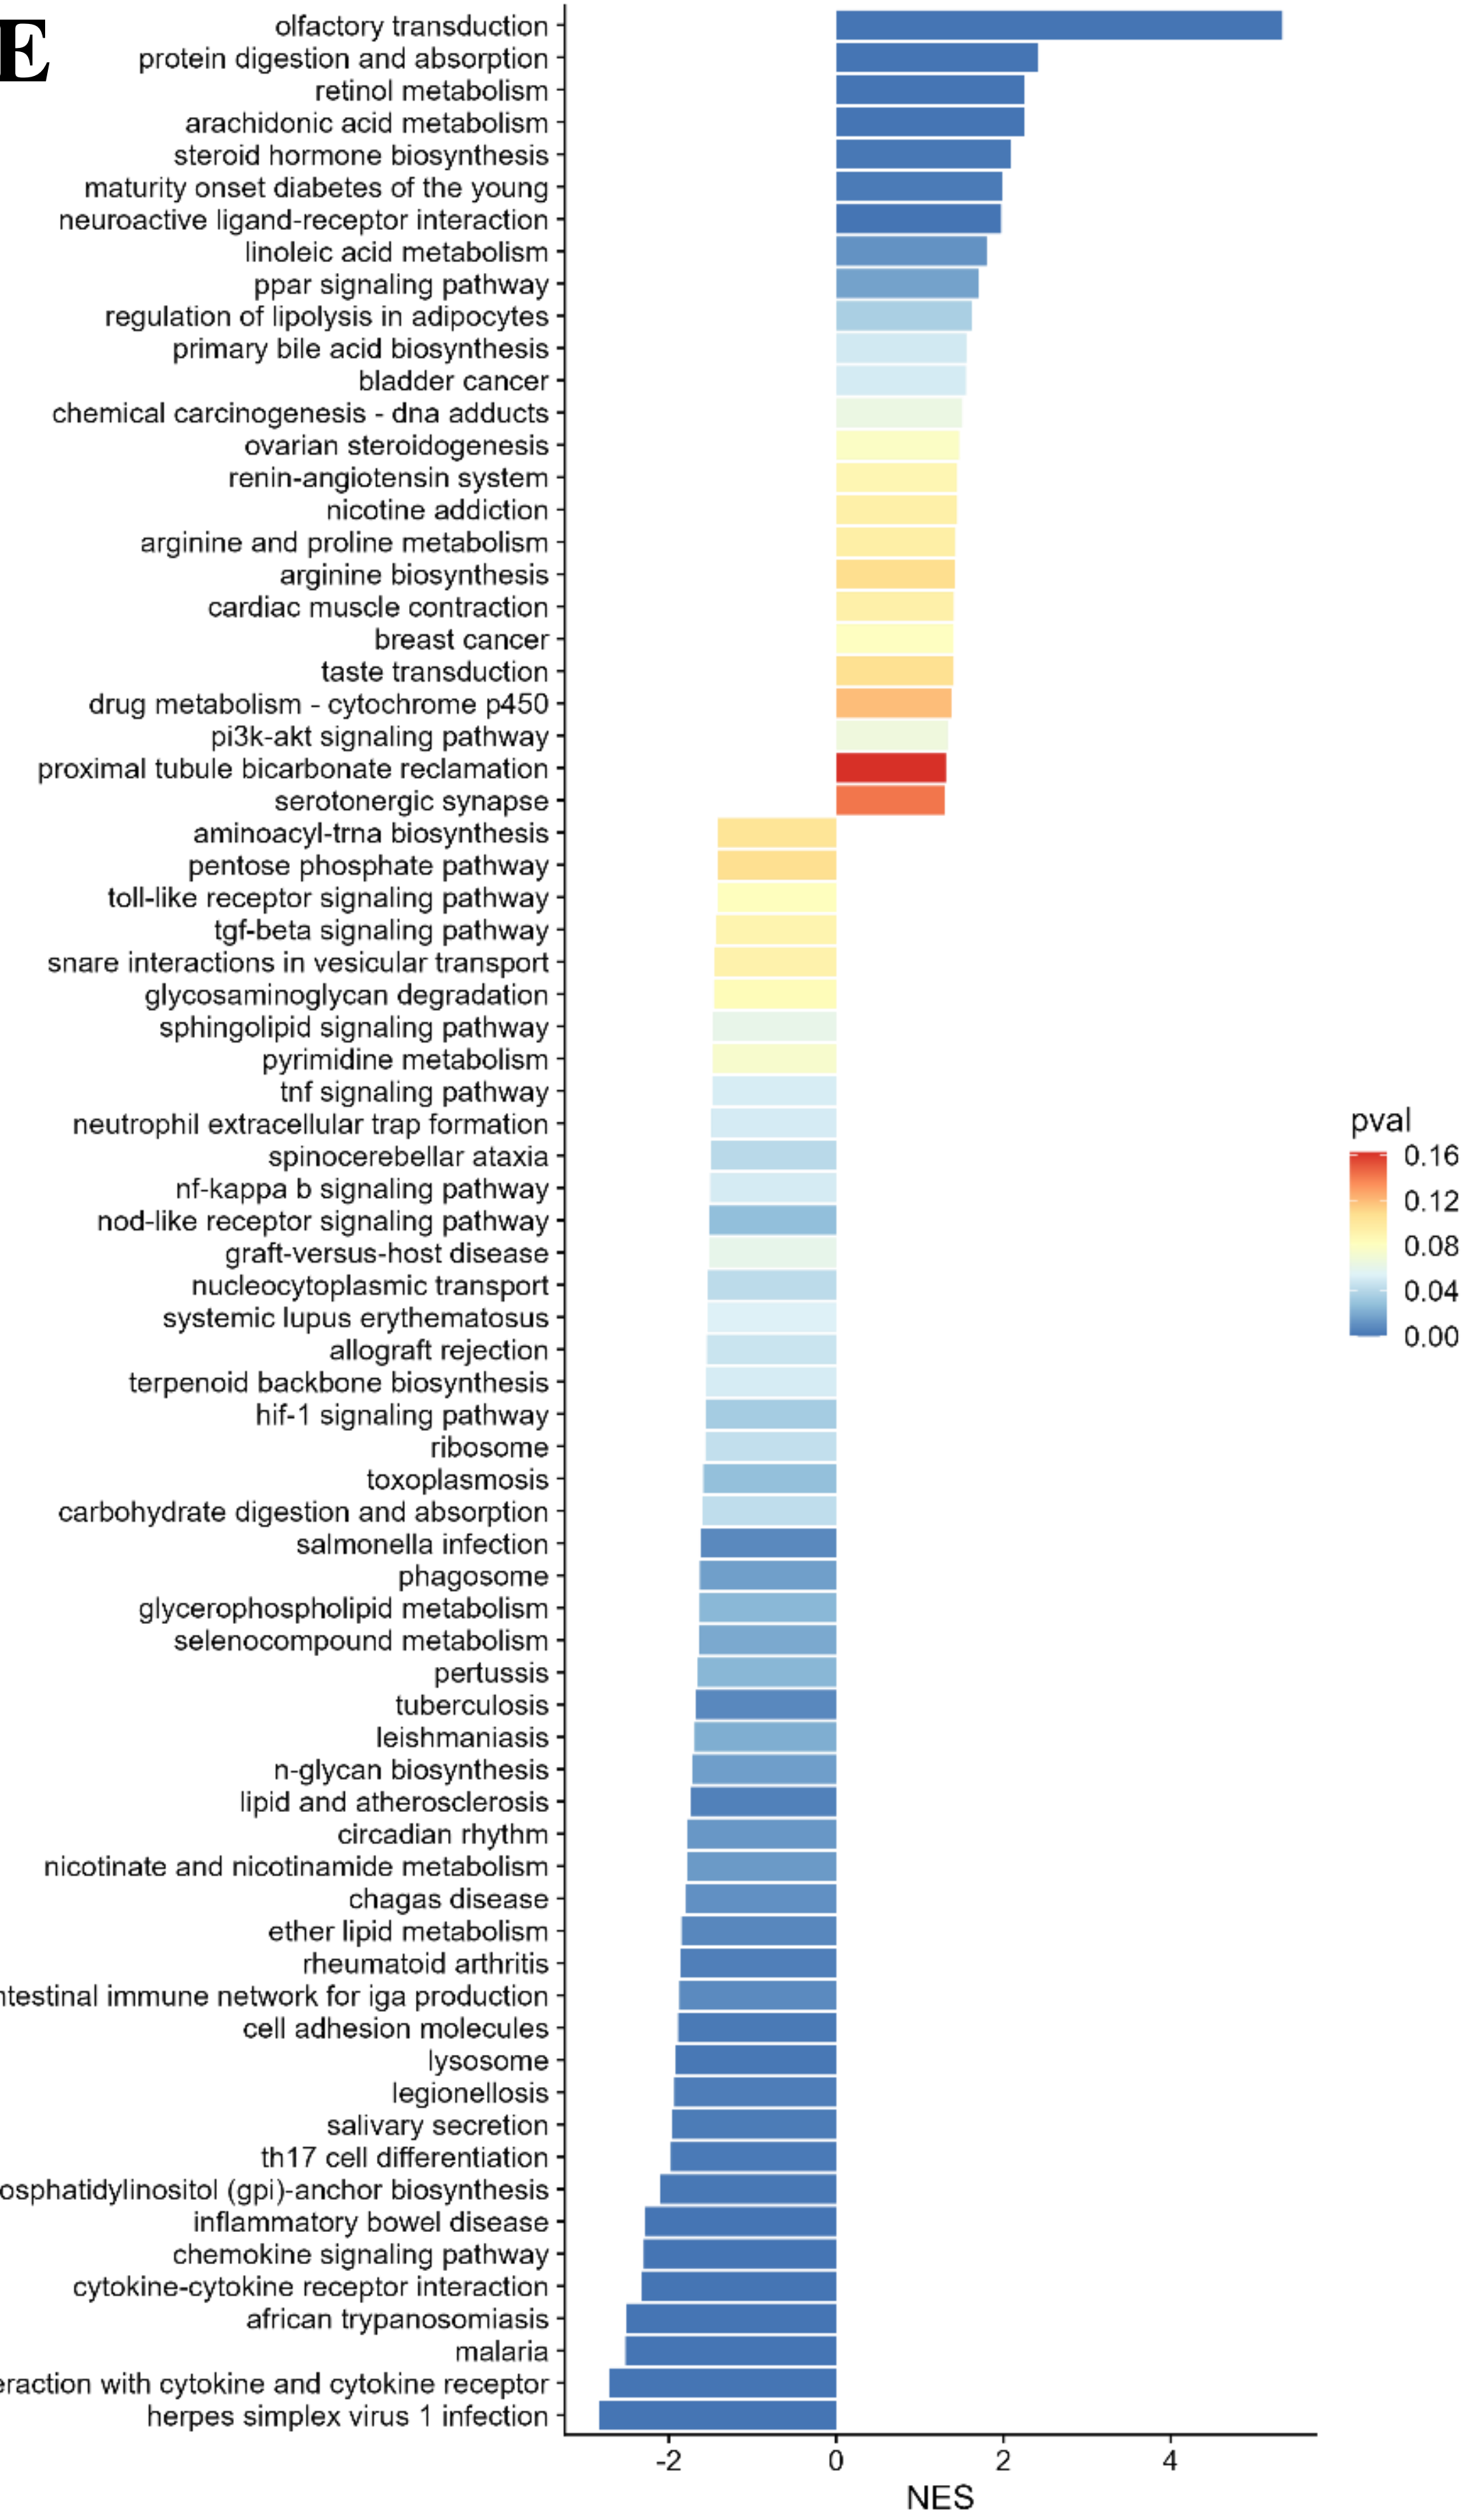**F**

Enrichment plot: 04659\_TH17 CELL DIFFERENTIATION

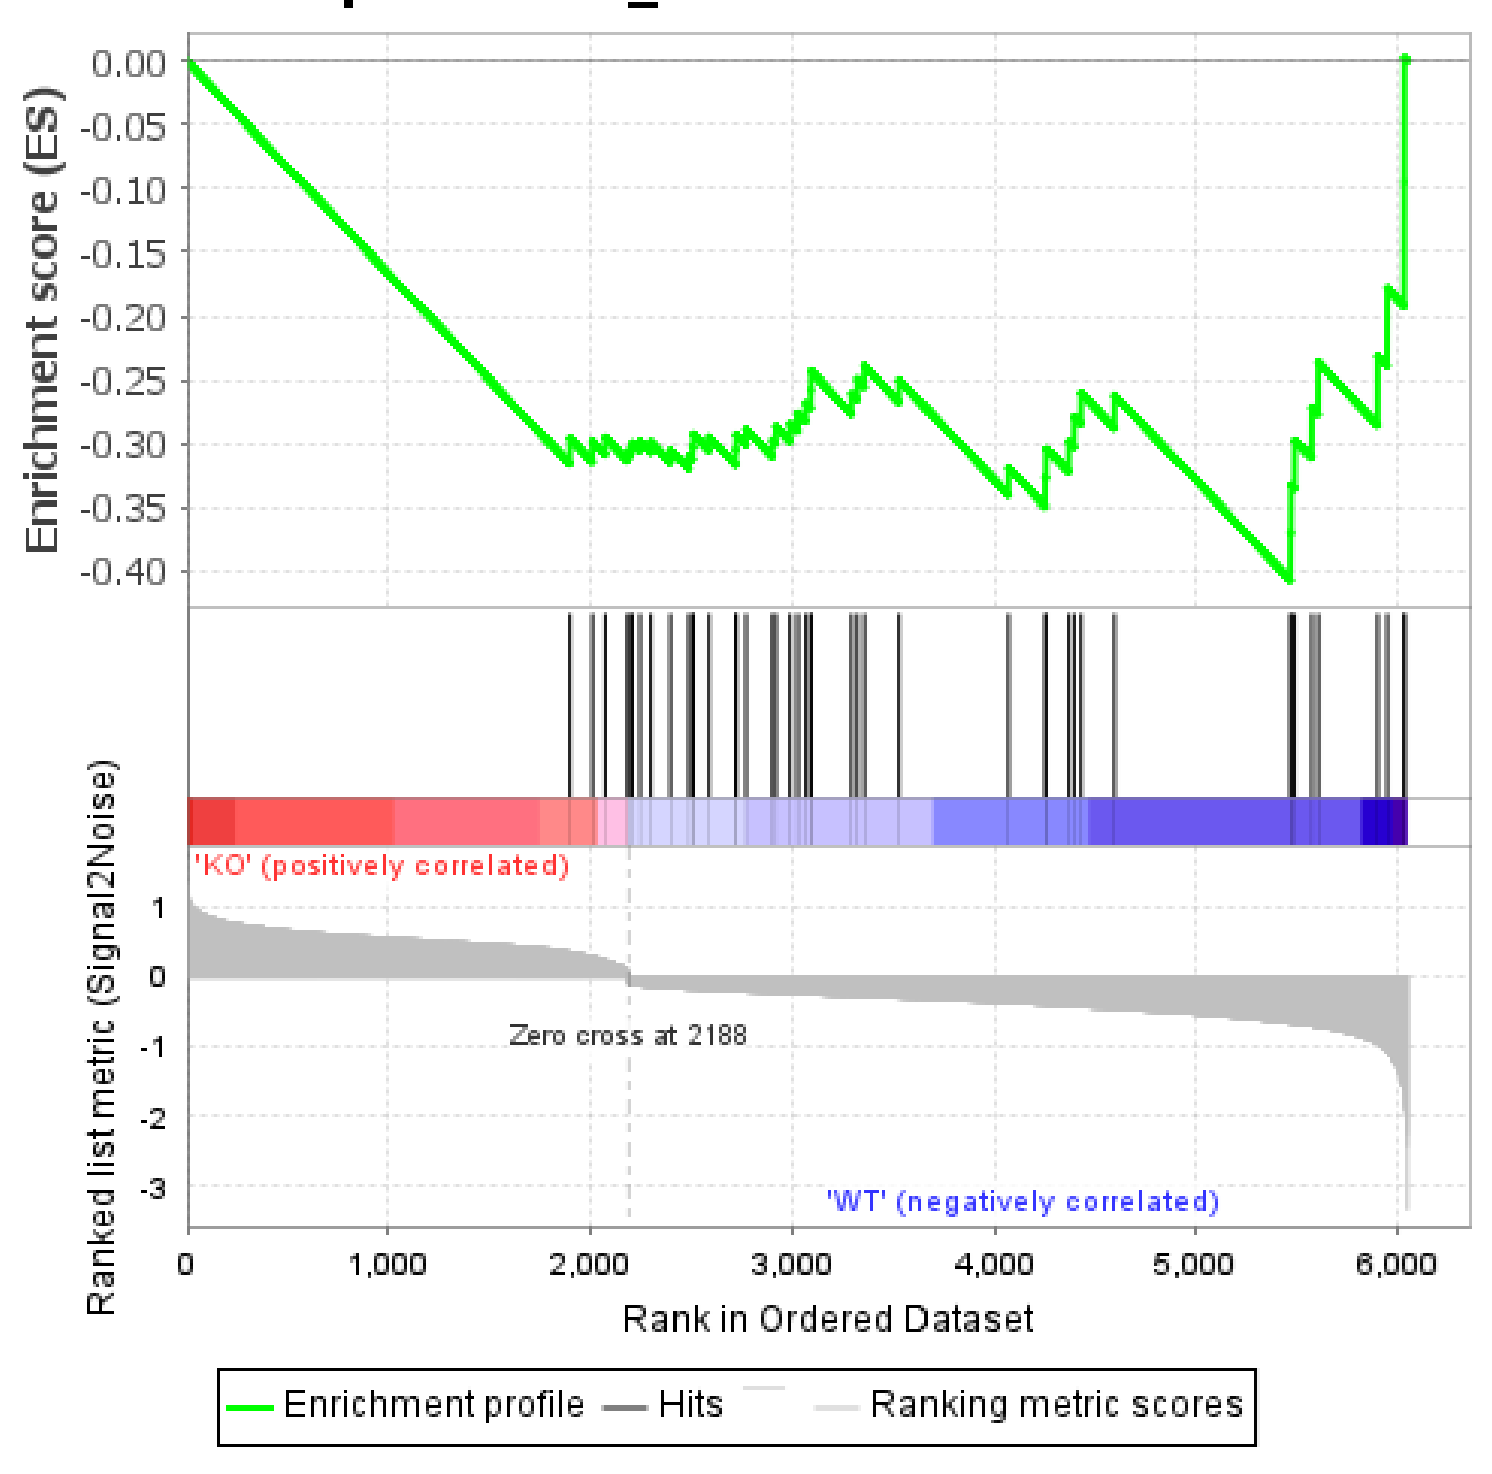

**Fig. S5. Transcriptional alterations in *Rbx1*&*Sag*-deficient Treg cells**

- (A) Transcriptional profiling revealed dramatic decreased levels of *Rbx1* and *Sag* in *Rbx1*&*Sag*-deficient Treg cells.
- (B) Volcano plot of the transcriptional alterations in *Rbx1*&*Sag*-deficient Treg cells compared to the *Foxp3<sup>Cre</sup>* control Treg cells.
- (C) Scatter plot of the transcriptional programs revealed from *Rbx1*&*Sag*-deficient Treg cells compared to the *Foxp3<sup>Cre</sup>* control Treg cells.
- (D) Top 20 up-regulated genes in *Rbx1*&*Sag*-deficient Treg cells compared to the *Foxp3<sup>Cre</sup>* control Treg cells with alters more than 1.5-folds and  $p$ -values $<0.05$ .
- (E) GSEA pathway analysis of the transcriptional alterations in *Rbx1*&*Sag*-deficient Treg cells compared to the *Foxp3<sup>Cre</sup>* control Treg cells; genes with alterations more than 1.5-folds, with  $p$ -values $<0.05$  were selected.
- (F) Gene set enrichment analysis of T<sub>H</sub>17 cell differentiation genes in CD4<sup>+</sup>YFP<sup>+</sup> Treg cells from *Foxp3<sup>Cre/wt</sup>* and *Foxp3<sup>Cre/wt</sup>;Rbx1<sup>fl/fl</sup>;Sag<sup>fl/fl</sup>* mice, determined by transcriptional profiling with  $Fc>1.5$  and  $p<0.05$ .



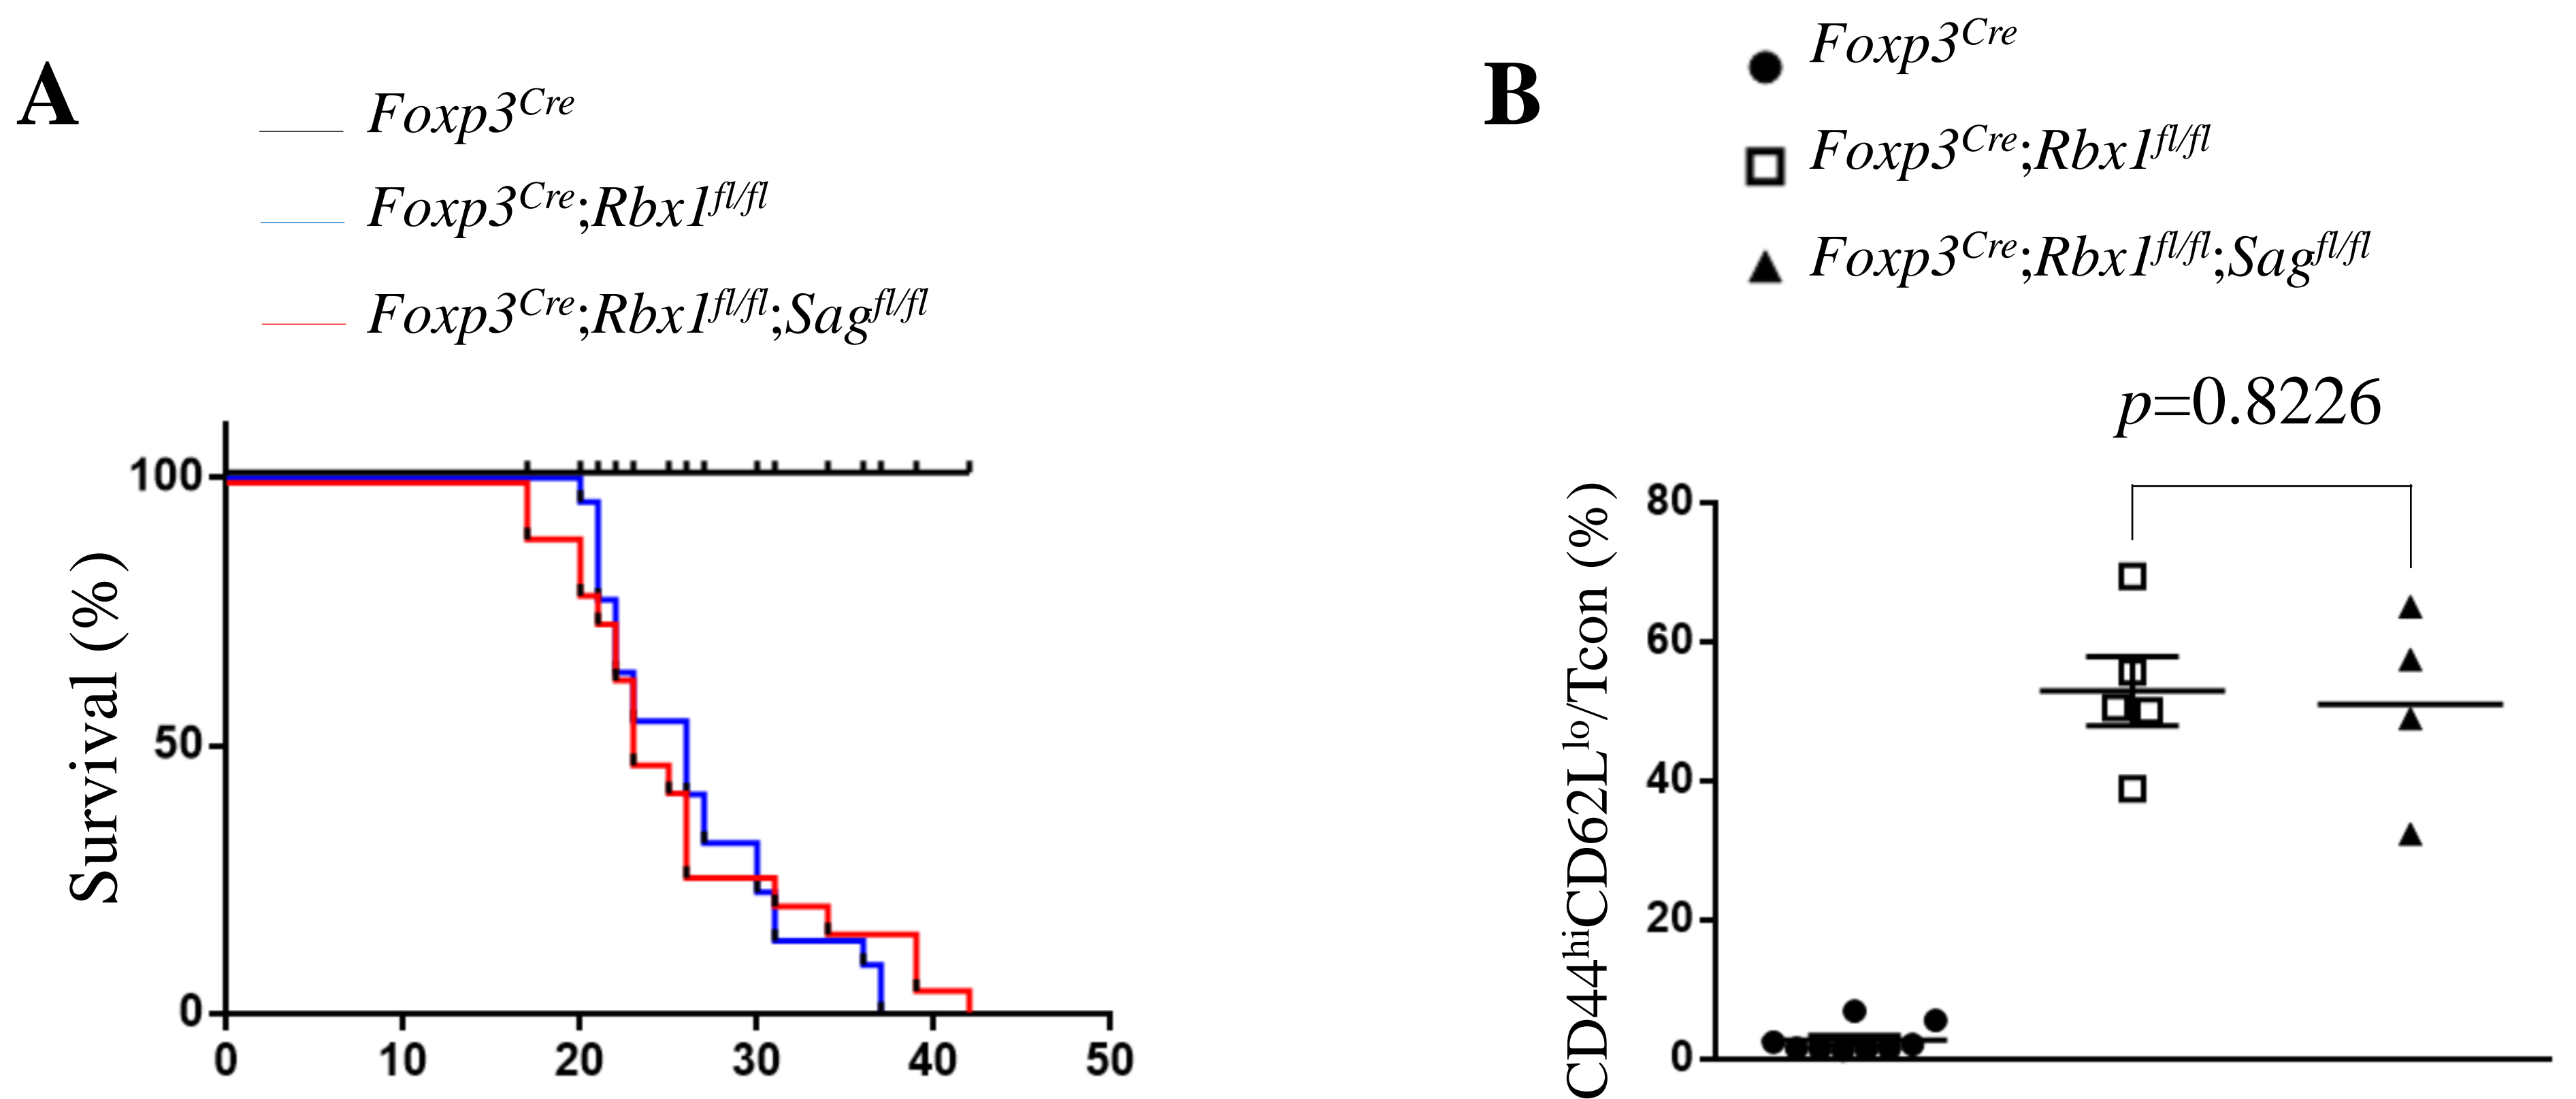

**Fig. S6. Comparison of the auto-immune disorders caused by deletion of *Rbx1* or *Rbx1*&*Sag* in Treg cells**

(A) Survival curve of  $Foxp3^{Cre}$ ,  $Foxp3^{Cre};Rbx1^{fl/fl}$  and  $Foxp3^{Cre};Rbx1^{fl/fl};Sag^{fl/fl}$  mice.

(B) The proportion of effector/memory cells ( $CD44^{hi}CD62L^{lo}$ ) among Tcon cells in peripheral lymph nodes from  $Foxp3^{Cre}$ ,  $Foxp3^{Cre};Rbx1^{fl/fl}$  and  $Foxp3^{Cre};Rbx1^{fl/fl};Sag^{fl/fl}$  mice (p19-23).

**A**

| Gene symbol     | <i>Foxp3</i> <sup>Cre/wt</sup><br>(average, log2) | <i>Foxp3</i> <sup>Cre/wt</sup> ; <i>Rbx1</i> <sup>fl/fl</sup> ; <i>Sag</i> <sup>fl/fl</sup><br>(average, log2) | Fold change |
|-----------------|---------------------------------------------------|----------------------------------------------------------------------------------------------------------------|-------------|
| <i>Sik1</i>     | 8.27                                              | 12.97                                                                                                          | 25.877      |
| <i>Csrnp1</i>   | 7.30                                              | 11.70                                                                                                          | 21.035      |
| <i>Ppp1r15a</i> | 6.50                                              | 10.84                                                                                                          | 20.267      |
| <i>Plk2</i>     | 4.89                                              | 9.19                                                                                                           | 19.806      |
| <i>Tnfaip3</i>  | 14.87                                             | 18.97                                                                                                          | 17.156      |
| <i>Nr4a2</i>    | 9.65                                              | 13.67                                                                                                          | 16.298      |
| <i>Dusp10</i>   | 13.43                                             | 17.43                                                                                                          | 15.963      |
| <i>Dusp5</i>    | 12.01                                             | 15.79                                                                                                          | 13.811      |
| <i>Zbtb10</i>   | 5.48                                              | 9.11                                                                                                           | 12.367      |
| <i>Zfand2a</i>  | 11.07                                             | 14.64                                                                                                          | 11.877      |
| <i>Rgs2</i>     | 11.28                                             | 14.83                                                                                                          | 11.662      |
| <i>Hexim1</i>   | 8.88                                              | 12.18                                                                                                          | 9.826       |
| <i>Ets2</i>     | 5.52                                              | 8.79                                                                                                           | 9.657       |
| <i>Irs2</i>     | 7.99                                              | 11.15                                                                                                          | 8.946       |
| <i>Six1</i>     | 4.34                                              | 7.49                                                                                                           | 8.885       |
| <i>Stard9</i>   | 8.92                                              | 12.07                                                                                                          | 8.841       |
| <i>Gm17535</i>  | 13.71                                             | 16.84                                                                                                          | 8.795       |
| <i>Nr4a1</i>    | 11.19                                             | 14.28                                                                                                          | 8.513       |
| <i>Klf6</i>     | 11.86                                             | 14.87                                                                                                          | 8.093       |
| <i>Rgcc</i>     | 5.88                                              | 8.87                                                                                                           | 7.911       |

**B**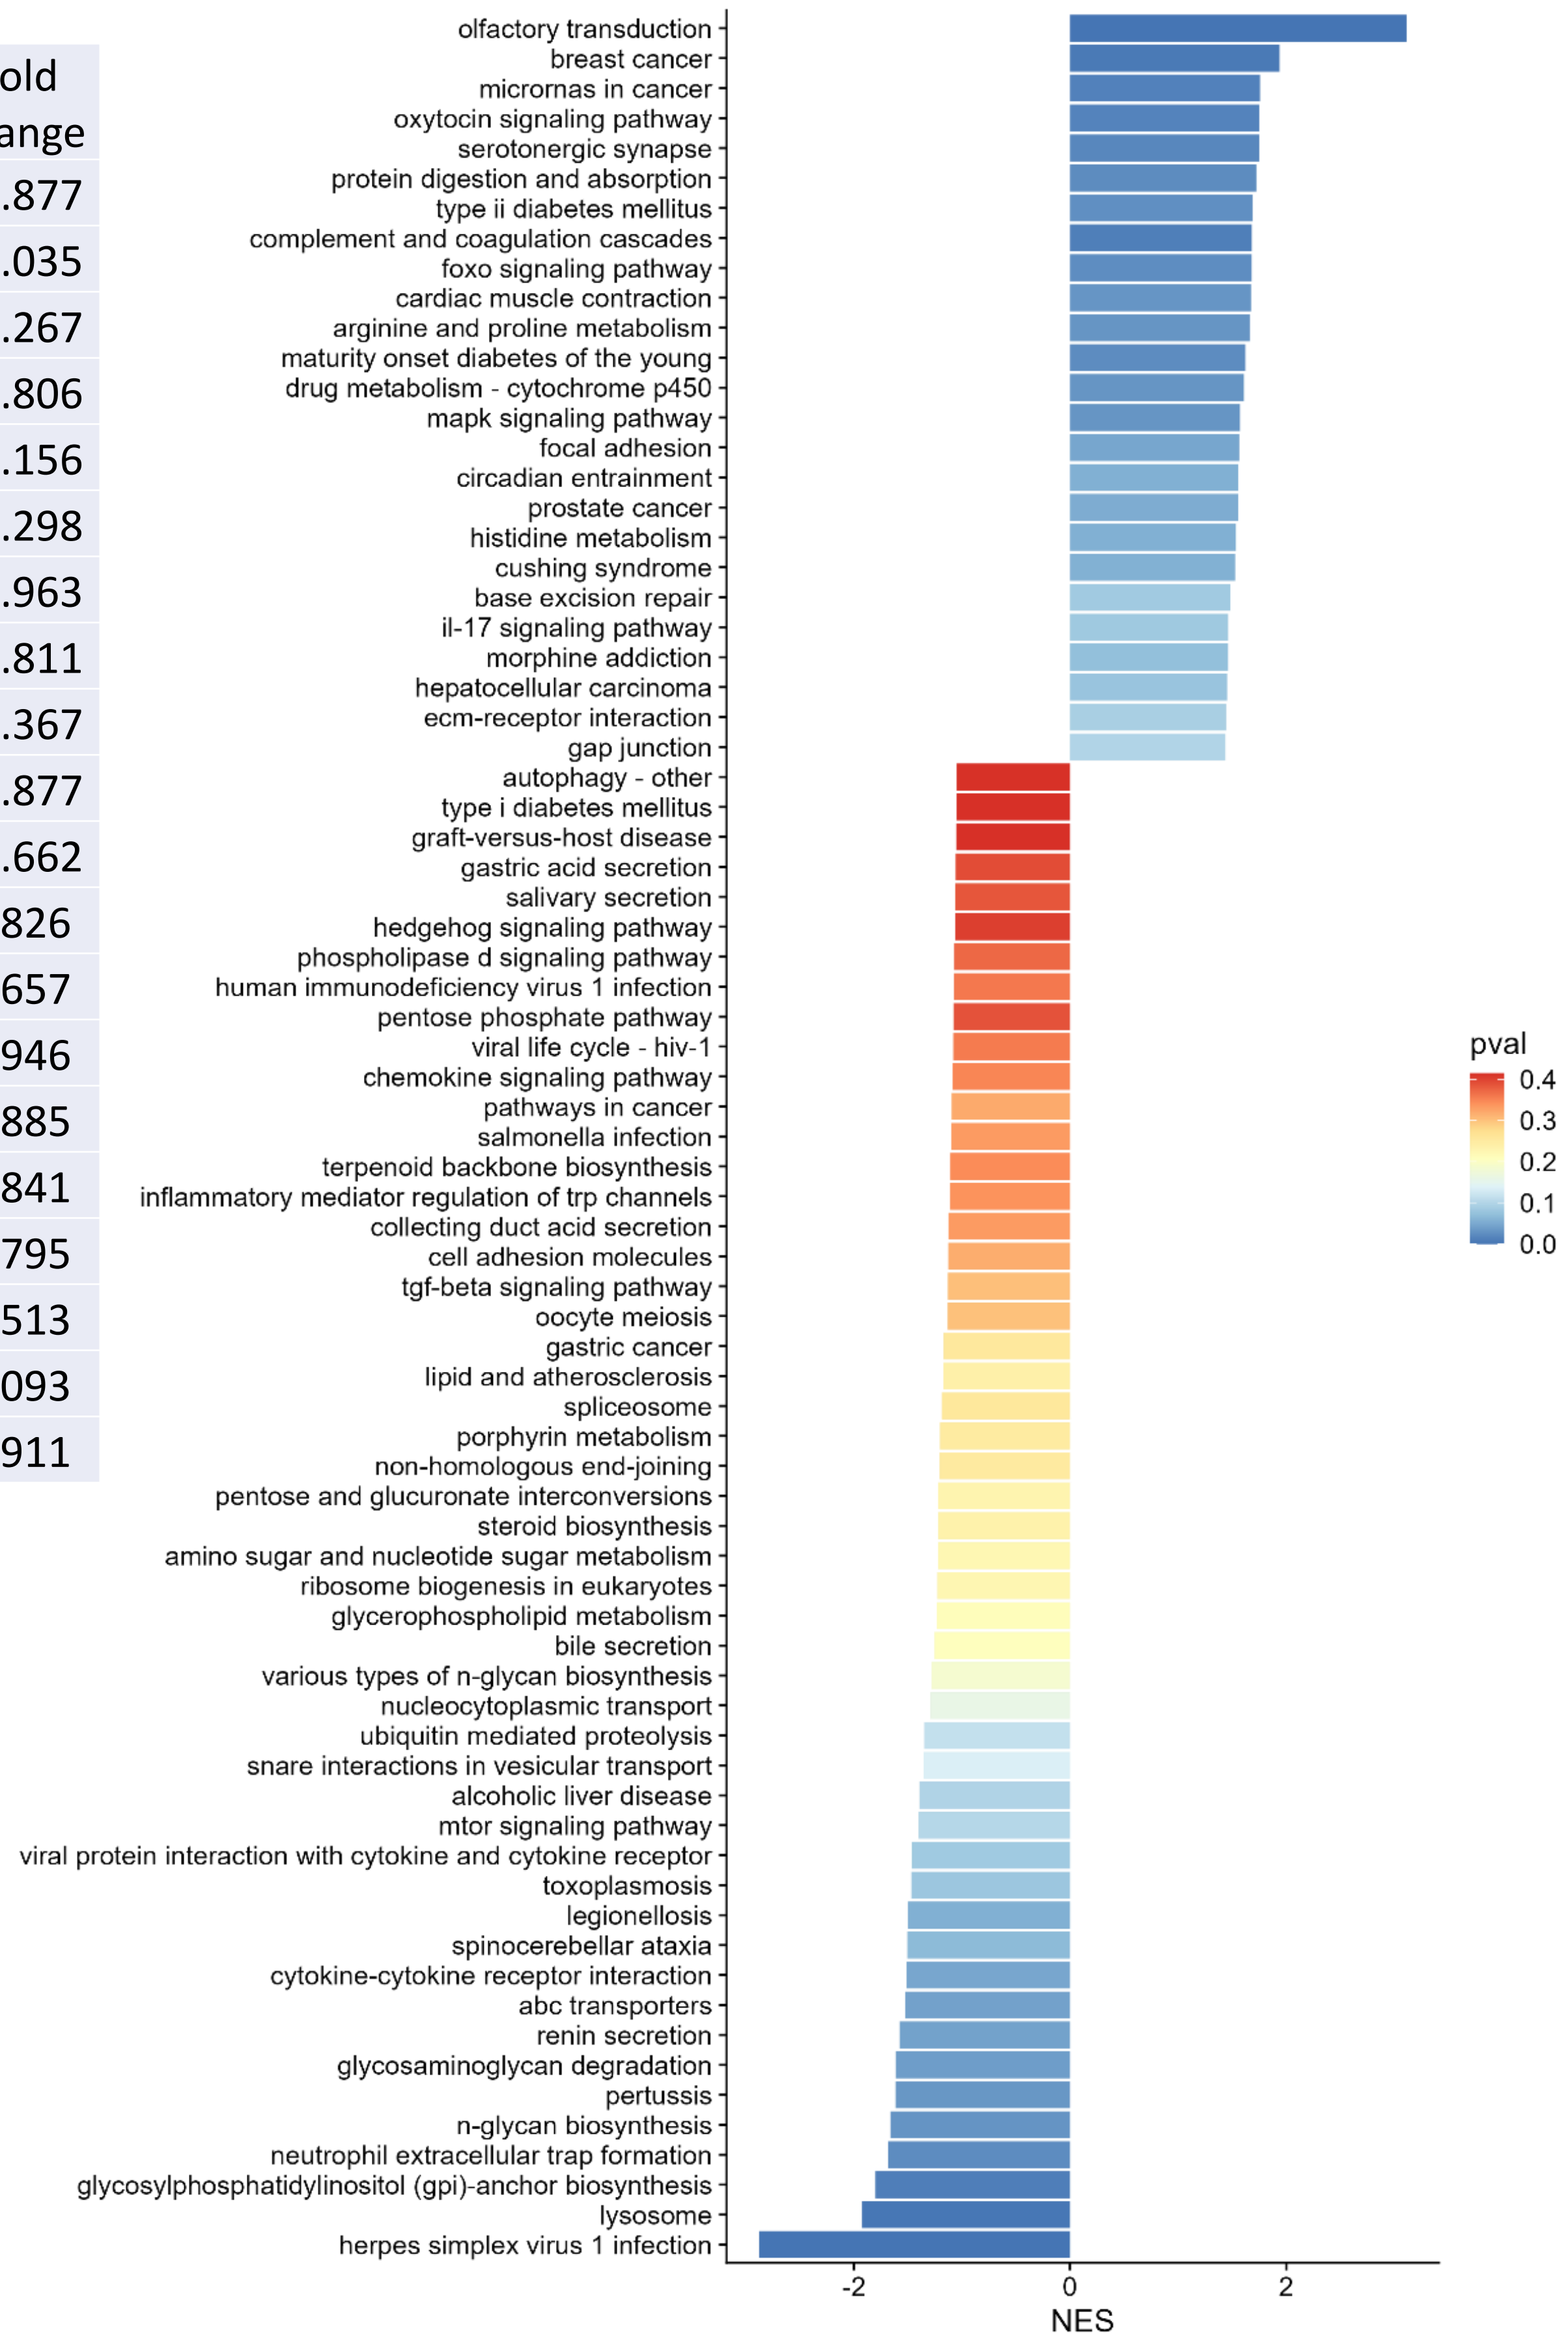

**Fig. S7. Comparison of the signal alterations caused by deletion of *Rbx1* or *Rbx1&Sag* in Treg cells**

(A) Top 20 up-regulated genes in *Rbx1&Sag*-deficient, but not *Rbx1*-deficient, Treg cells.

(B) GSEA pathway analysis of genes altered in *Rbx1&Sag*-deficient, but not *Rbx1*-deficient Treg cells.



**A**

| Gene symbol     | <i>Foxp3</i> <sup>Cre/wt</sup> (average, log2) | <i>Foxp3</i> <sup>Cre/wt</sup> ; <i>Rbx1</i> <sup>fl/fl</sup> ; <i>Sag</i> <sup>fl/fl</sup> (average, log2) | Fold change |
|-----------------|------------------------------------------------|-------------------------------------------------------------------------------------------------------------|-------------|
| <i>ND6</i>      | 13.75                                          | 19.04                                                                                                       | 39.124      |
| <i>Ppp1r15a</i> | 6.09                                           | 11.01                                                                                                       | 30.274      |
| <i>Sik1</i>     | 8.07                                           | 12.86                                                                                                       | 27.665      |
| <i>Csrnp1</i>   | 7.43                                           | 12.18                                                                                                       | 26.909      |
| <i>Plk2</i>     | 5.18                                           | 9.77                                                                                                        | 24.084      |
| <i>Gm10382</i>  | 7.81                                           | 12.21                                                                                                       | 21.112      |
| <i>Gm11175</i>  | 7.11                                           | 11.45                                                                                                       | 20.252      |
| <i>Dusp10</i>   | 13.4                                           | 17.63                                                                                                       | 18.765      |
| <i>Gm2174</i>   | 6.82                                           | 10.93                                                                                                       | 17.268      |
| <i>Nr4a2</i>    | 9.63                                           | 13.72                                                                                                       | 17.030      |
| <i>Tnfaip3</i>  | 14.71                                          | 18.70                                                                                                       | 15.889      |
| <i>Dusp5</i>    | 11.7                                           | 15.67                                                                                                       | 15.671      |
| <i>Zfand2a</i>  | 10.71                                          | 14.63                                                                                                       | 15.137      |
| <i>Irs2</i>     | 7.65                                           | 11.32                                                                                                       | 12.729      |
| <i>Gm10135</i>  | 9.62                                           | 13.07                                                                                                       | 10.928      |
| <i>Klf2</i>     | 9.92                                           | 13.32                                                                                                       | 10.556      |
| <i>Dusp4</i>    | 6.83                                           | 10.18                                                                                                       | 10.196      |
| <i>Nr4a1</i>    | 10.94                                          | 14.26                                                                                                       | 9.987       |
| <i>Maff</i>     | 3.31                                           | 6.63                                                                                                        | 9.987       |
| <i>Rgcc</i>     | 5.78                                           | 9.10                                                                                                        | 9.987       |

**B**

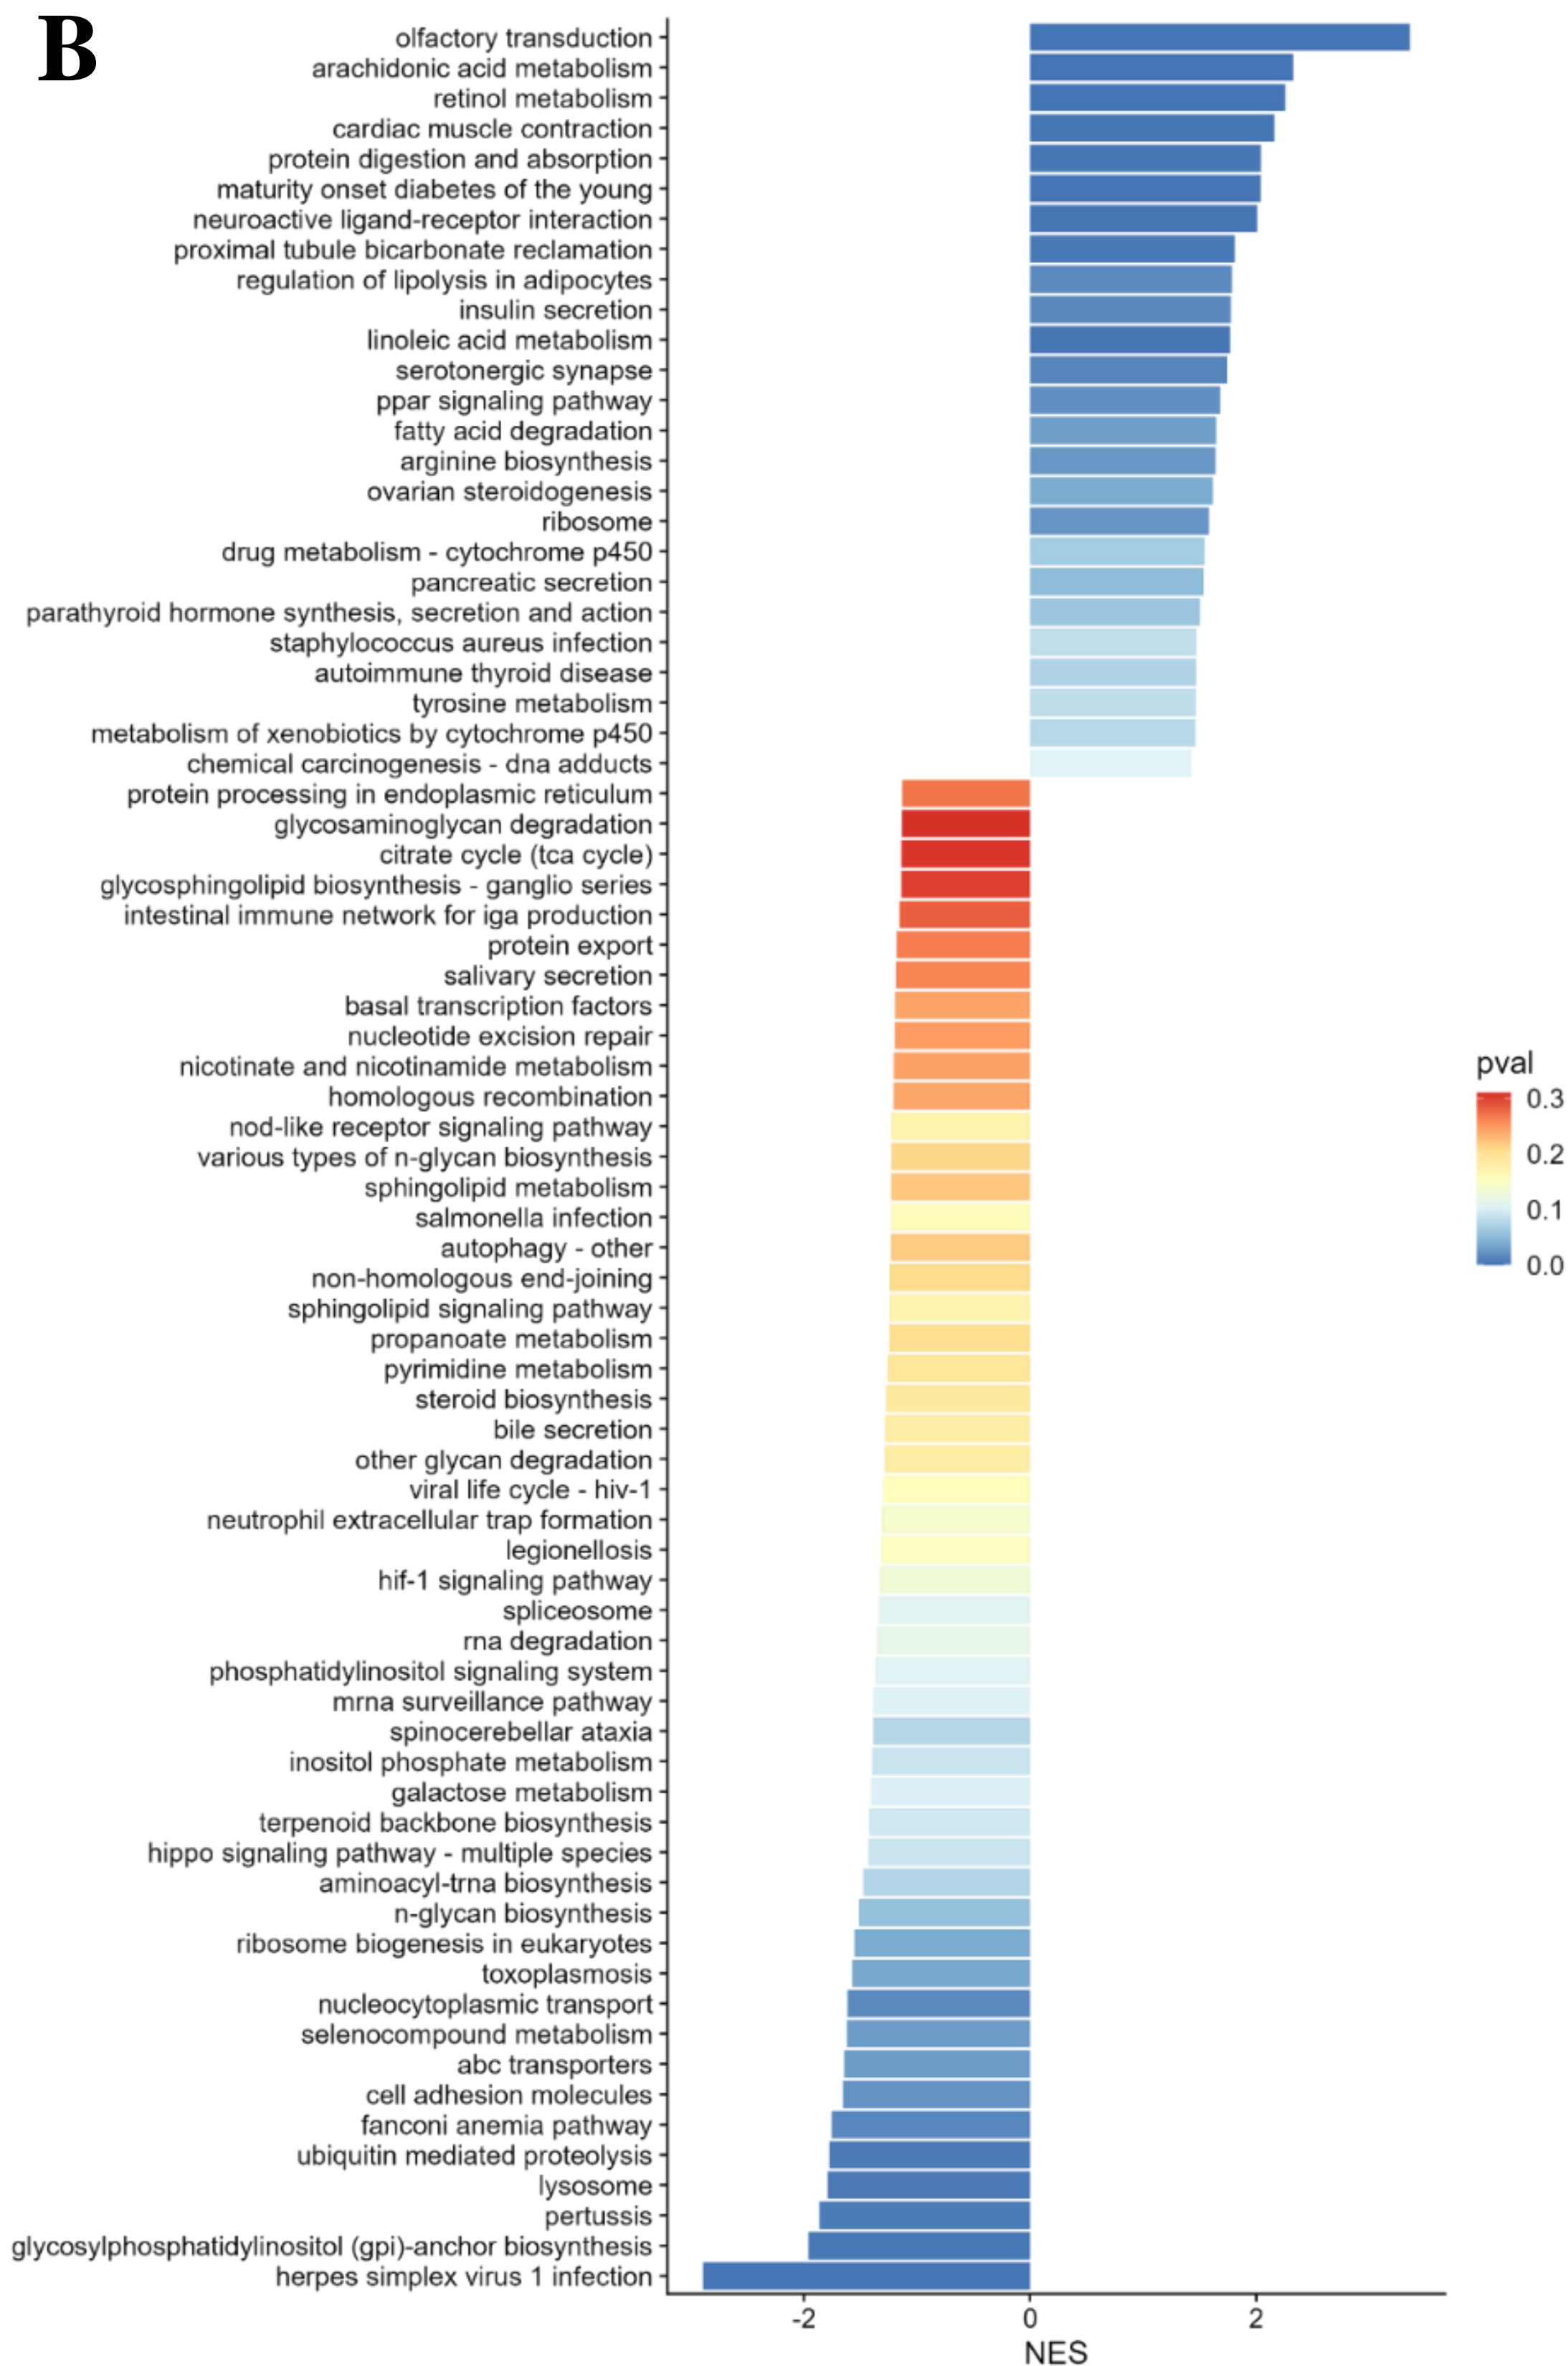

**C**

**Enrichment plot: 04740\_OLFACTORY TRANSDUCTION**

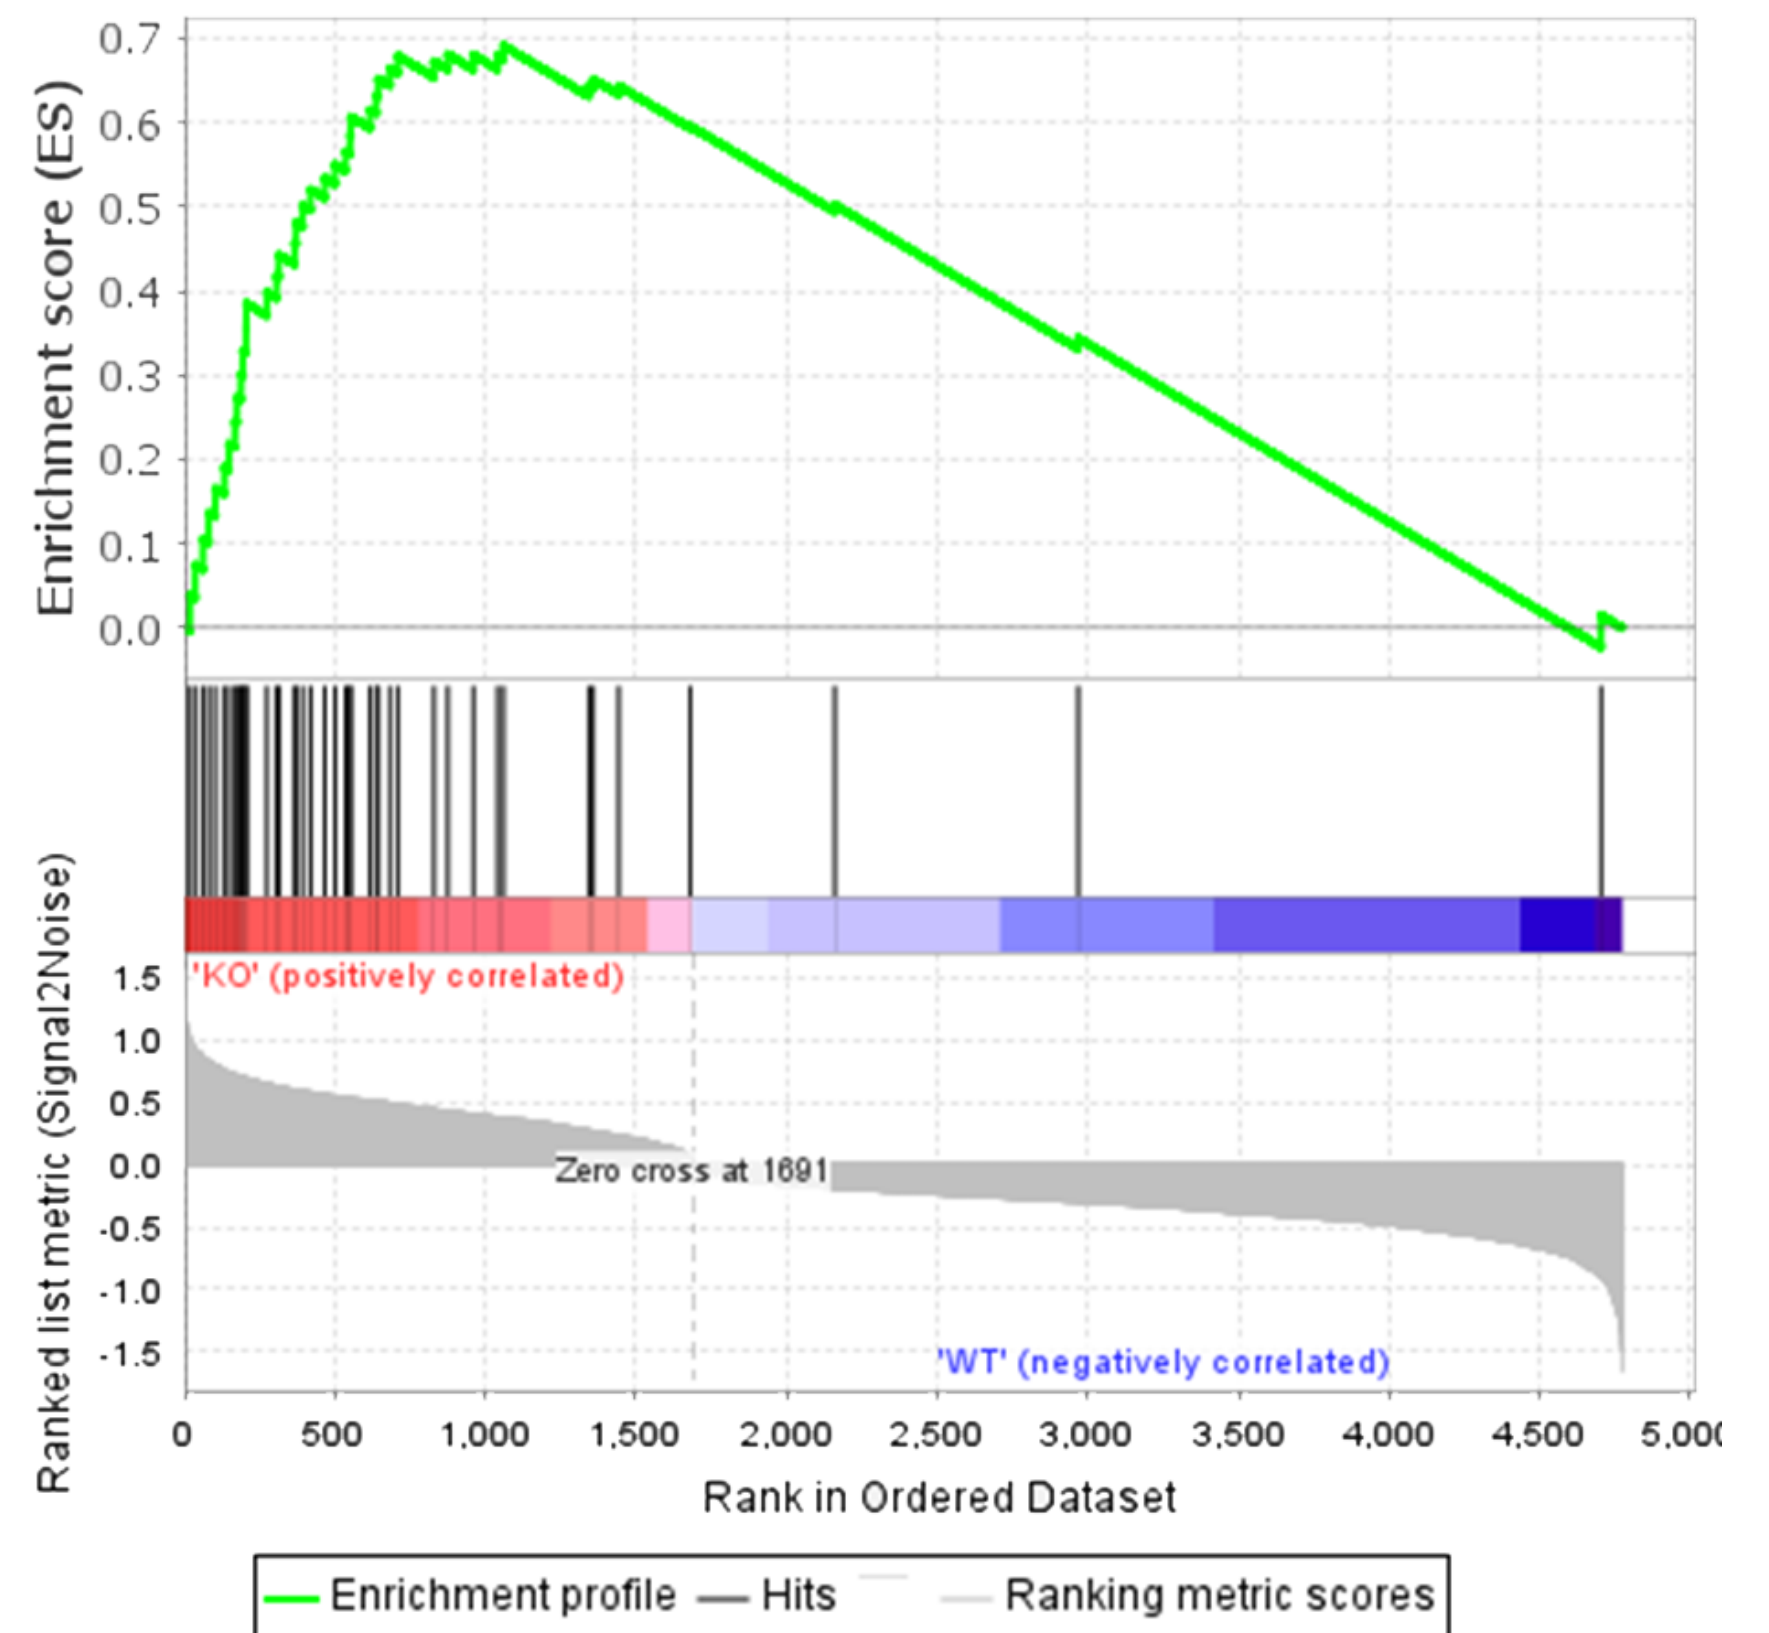

**Fig. S8. GSEA pathway analysis of genes selectively altered in *Rbx1*&*Sag*-deficient, but not *Ube2m*&*Ube2f*-deficient Treg cells**

(A) Top 20 up-regulated genes in *Rbx1*&*Sag*-deficient, but not *Ube2m*&*Ube2f*-deficient, Treg cells.

(B) GSEA pathway analysis of genes altered in *Rbx1*&*Sag*-deficient, but not *Ube2m*&*Ube2f*-deficient Treg cells.

(C) Gene set enrichment analysis of olfactory transduction genes in genes altered in *Rbx1*&*Sag*-deficient, but not *Ube2m*&*Ube2f*-deficient Treg cells.



**A**

| Gene symbol    | <i>Foxp3</i> <sup>Cre/wt</sup><br>(average, log2) | <i>Foxp3</i> <sup>Cre/wt;Ube2m<sup>fl/fl</sup>;Ube2f<sup>fl/fl</sup></sup><br>(average, log2) | Fold change |
|----------------|---------------------------------------------------|-----------------------------------------------------------------------------------------------|-------------|
| <i>Rgs16</i>   | 10.34                                             | 5.96                                                                                          | -20.821     |
| <i>Ube2m</i>   | 12.43                                             | 8.43                                                                                          | -16.000     |
| <i>Lgals1</i>  | 14.16                                             | 10.66                                                                                         | -11.314     |
| 1500004A13Rik  | 8.67                                              | 5.66                                                                                          | -8.056      |
| <i>Rln3</i>    | 8.84                                              | 5.85                                                                                          | -7.945      |
| <i>Rilpl2</i>  | 8.99                                              | 6.35                                                                                          | -6.233      |
| <i>Il18rap</i> | 7.61                                              | 5.14                                                                                          | -5.540      |
| <i>Pglyrp1</i> | 9.17                                              | 6.77                                                                                          | -5.278      |
| <i>Ctla2a</i>  | 7.68                                              | 5.28                                                                                          | -5.278      |
| <i>Ptprs</i>   | 10.05                                             | 7.69                                                                                          | -5.134      |
| <i>Dmbt1</i>   | 6.50                                              | 4.14                                                                                          | -5.134      |
| <i>Nfkbia</i>  | 15.07                                             | 12.8                                                                                          | -4.823      |
| <i>Ube2f</i>   | 12.19                                             | 9.93                                                                                          | -4.790      |
| <i>Itm2c</i>   | 11.94                                             | 9.78                                                                                          | -4.469      |
| <i>Tesc</i>    | 6.37                                              | 4.37                                                                                          | -4.000      |
| <i>Ccrl2</i>   | 7.46                                              | 5.48                                                                                          | -3.945      |
| <i>Timp2</i>   | 10.03                                             | 8.08                                                                                          | -3.864      |
| <i>Crip1</i>   | 11.52                                             | 9.59                                                                                          | -3.811      |
| <i>Fbxw8</i>   | 7.55                                              | 5.67                                                                                          | -3.681      |
| <i>Odc1</i>    | 9.54                                              | 7.67                                                                                          | -3.655      |

**B**

| Gene symbol    | <i>Foxp3</i> <sup>Cre/wt</sup><br>(average, log2) | <i>Foxp3</i> <sup>Cre/wt;Ube2m<sup>fl/fl</sup>;Ube2f<sup>fl/fl</sup></sup><br>(average, log2) | Fold change |
|----------------|---------------------------------------------------|-----------------------------------------------------------------------------------------------|-------------|
| <i>Pde3b</i>   | 5.43                                              | 9.22                                                                                          | 13.833      |
| <i>Chil5</i>   | 5.87                                              | 8.75                                                                                          | 7.362       |
| <i>Parp8</i>   | 10.44                                             | 13.2                                                                                          | 6.774       |
| <i>Gm3123</i>  | 3.76                                              | 6.26                                                                                          | 5.657       |
| <i>Gm8127</i>  | 4.58                                              | 7.03                                                                                          | 5.464       |
| <i>Gm10721</i> | 17.64                                             | 19.73                                                                                         | 4.257       |
| <i>Txnrd1</i>  | 9.40                                              | 11.41                                                                                         | 4.028       |
| <i>Elovl6</i>  | 6.72                                              | 8.63                                                                                          | 3.758       |
| <i>Trib2</i>   | 12.8                                              | 14.68                                                                                         | 3.681       |
| <i>Gm2310</i>  | 11.84                                             | 13.67                                                                                         | 3.555       |
| <i>Myb</i>     | 9.82                                              | 11.59                                                                                         | 3.411       |
| <i>Ms4a4c</i>  | 14.28                                             | 16.02                                                                                         | 3.340       |
| <i>Cers6</i>   | 8.97                                              | 10.71                                                                                         | 3.340       |
| <i>Gm8068</i>  | 4.56                                              | 6.24                                                                                          | 3.204       |
| <i>Gm8005</i>  | 4.38                                              | 6.00                                                                                          | 3.074       |
| <i>Olfr771</i> | 3.90                                              | 5.52                                                                                          | 3.074       |
| <i>Txk</i>     | 11.58                                             | 13.12                                                                                         | 2.908       |
| <i>Gm826</i>   | 7.81                                              | 9.34                                                                                          | 2.888       |
| <i>Cln3</i>    | 9.47                                              | 10.99                                                                                         | 2.868       |
| <i>Gm10576</i> | 9.24                                              | 10.75                                                                                         | 2.848       |

**C**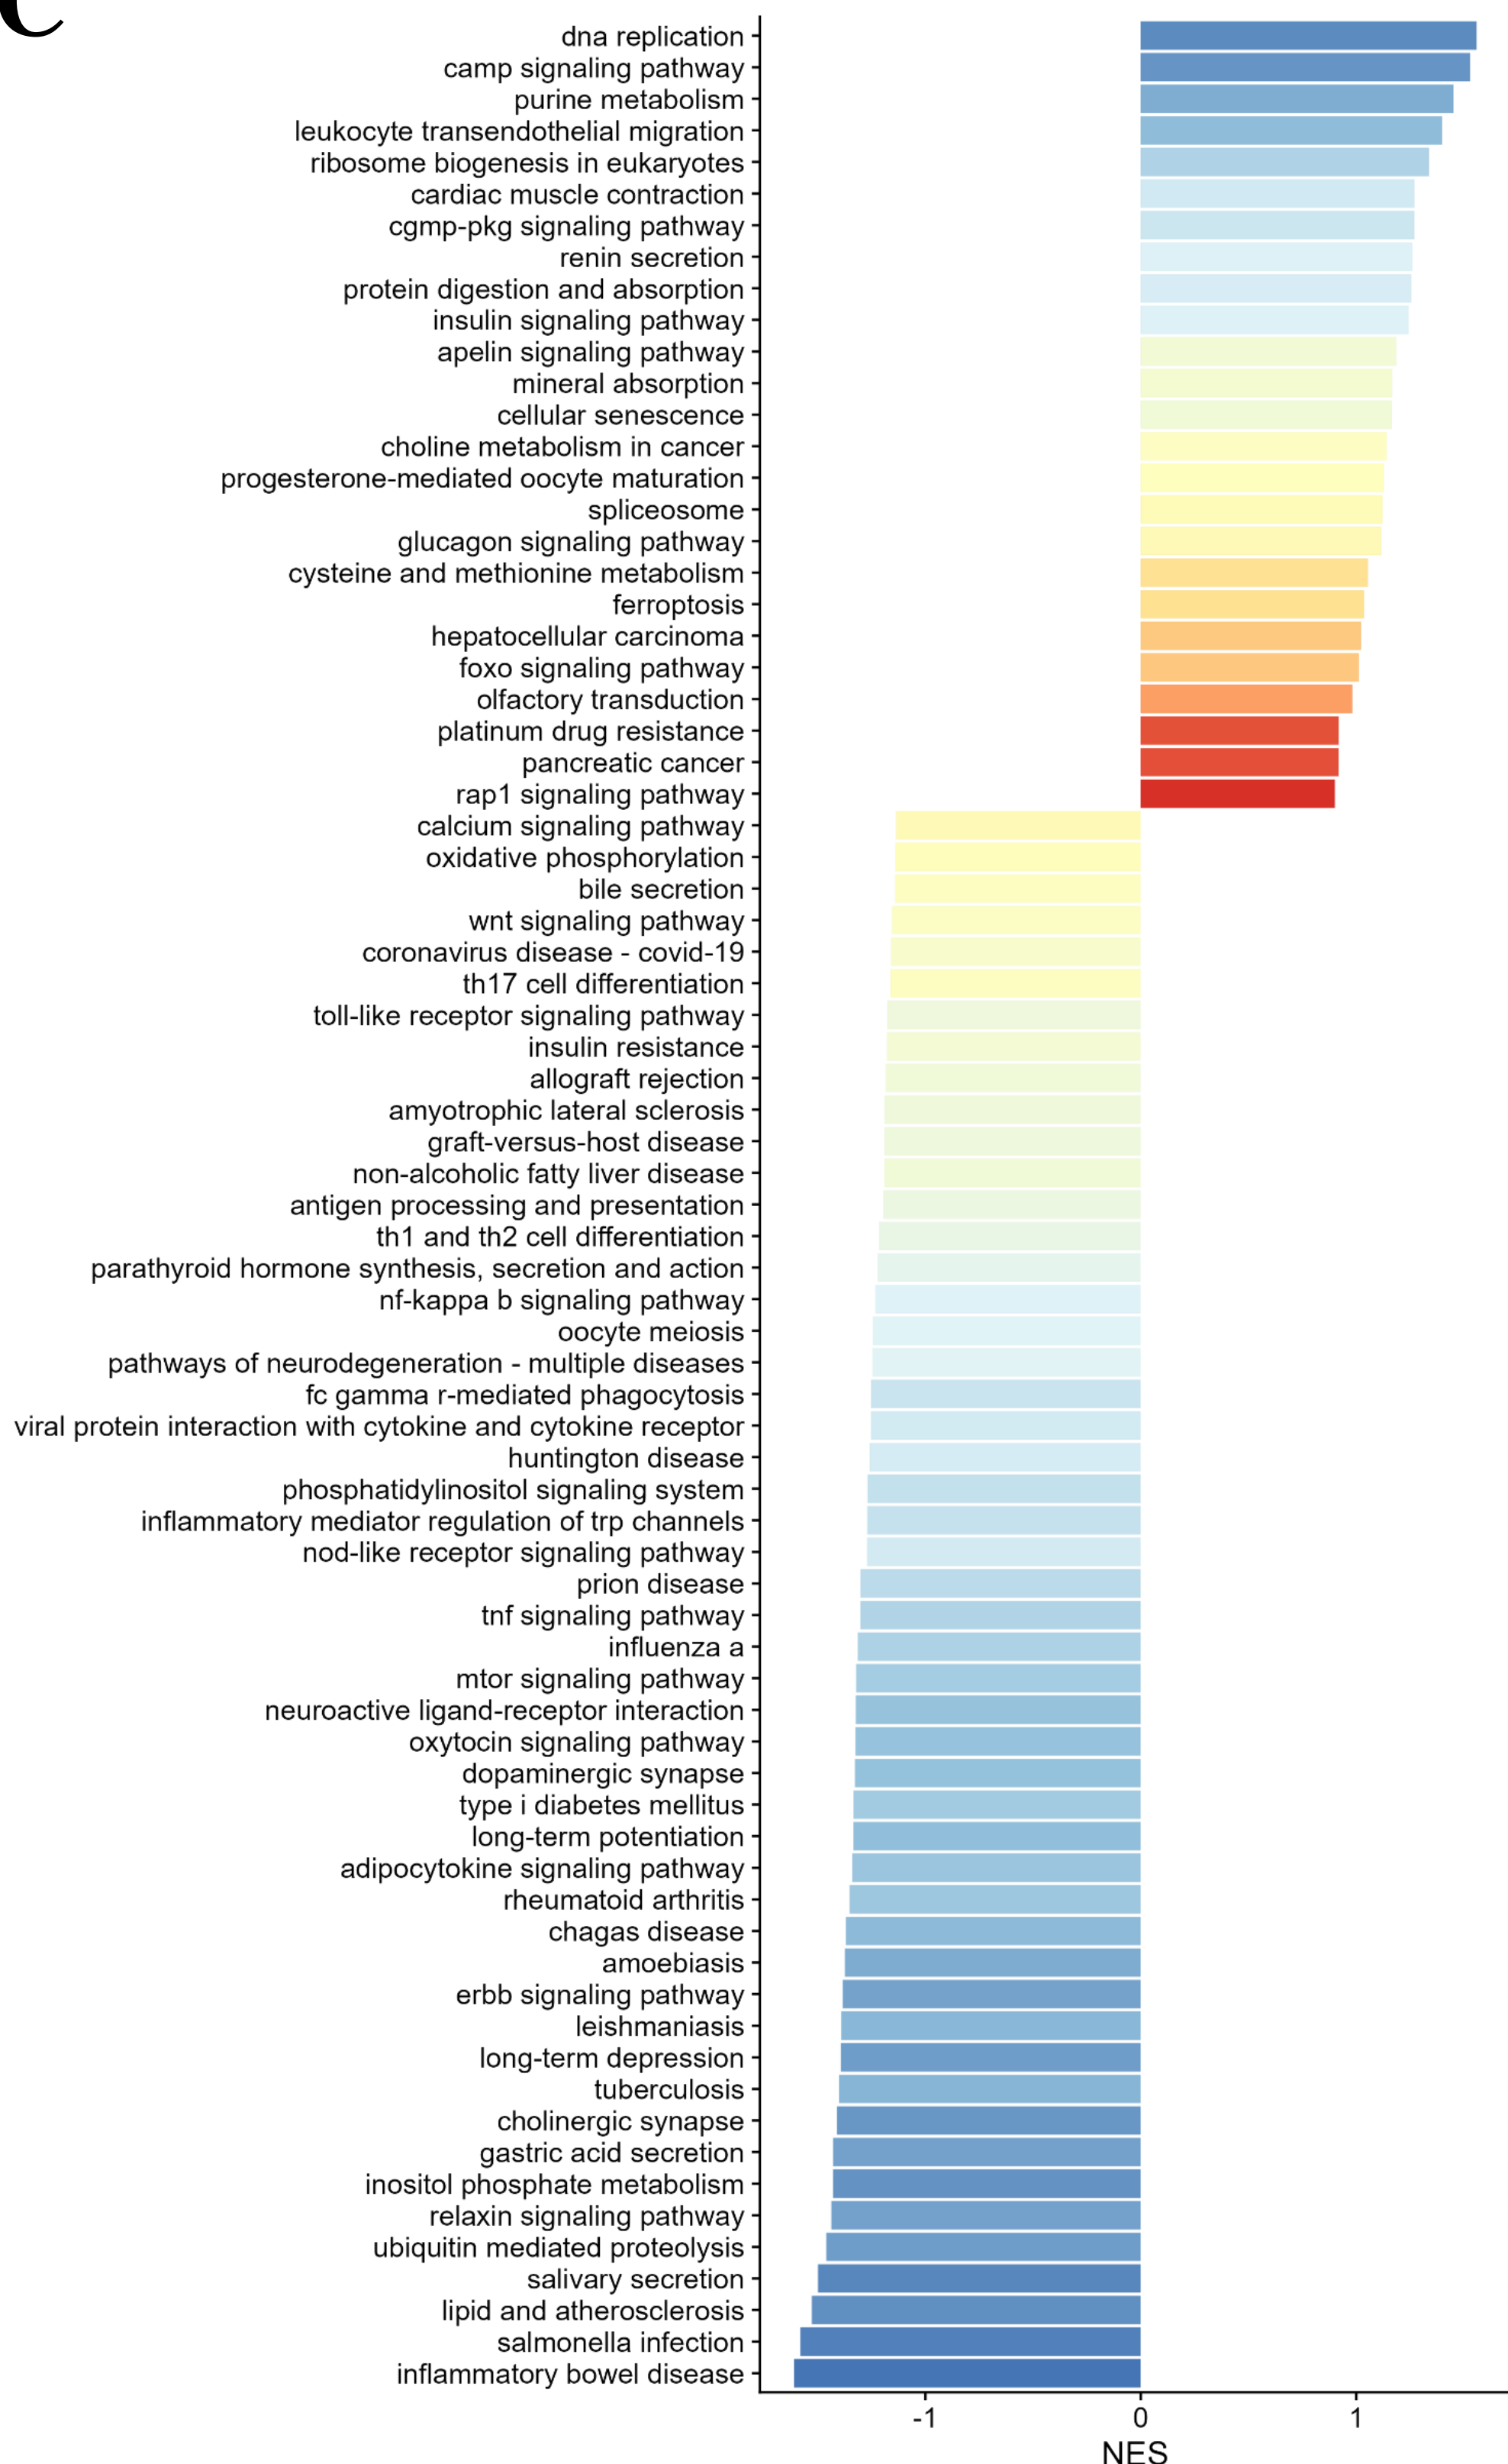**D**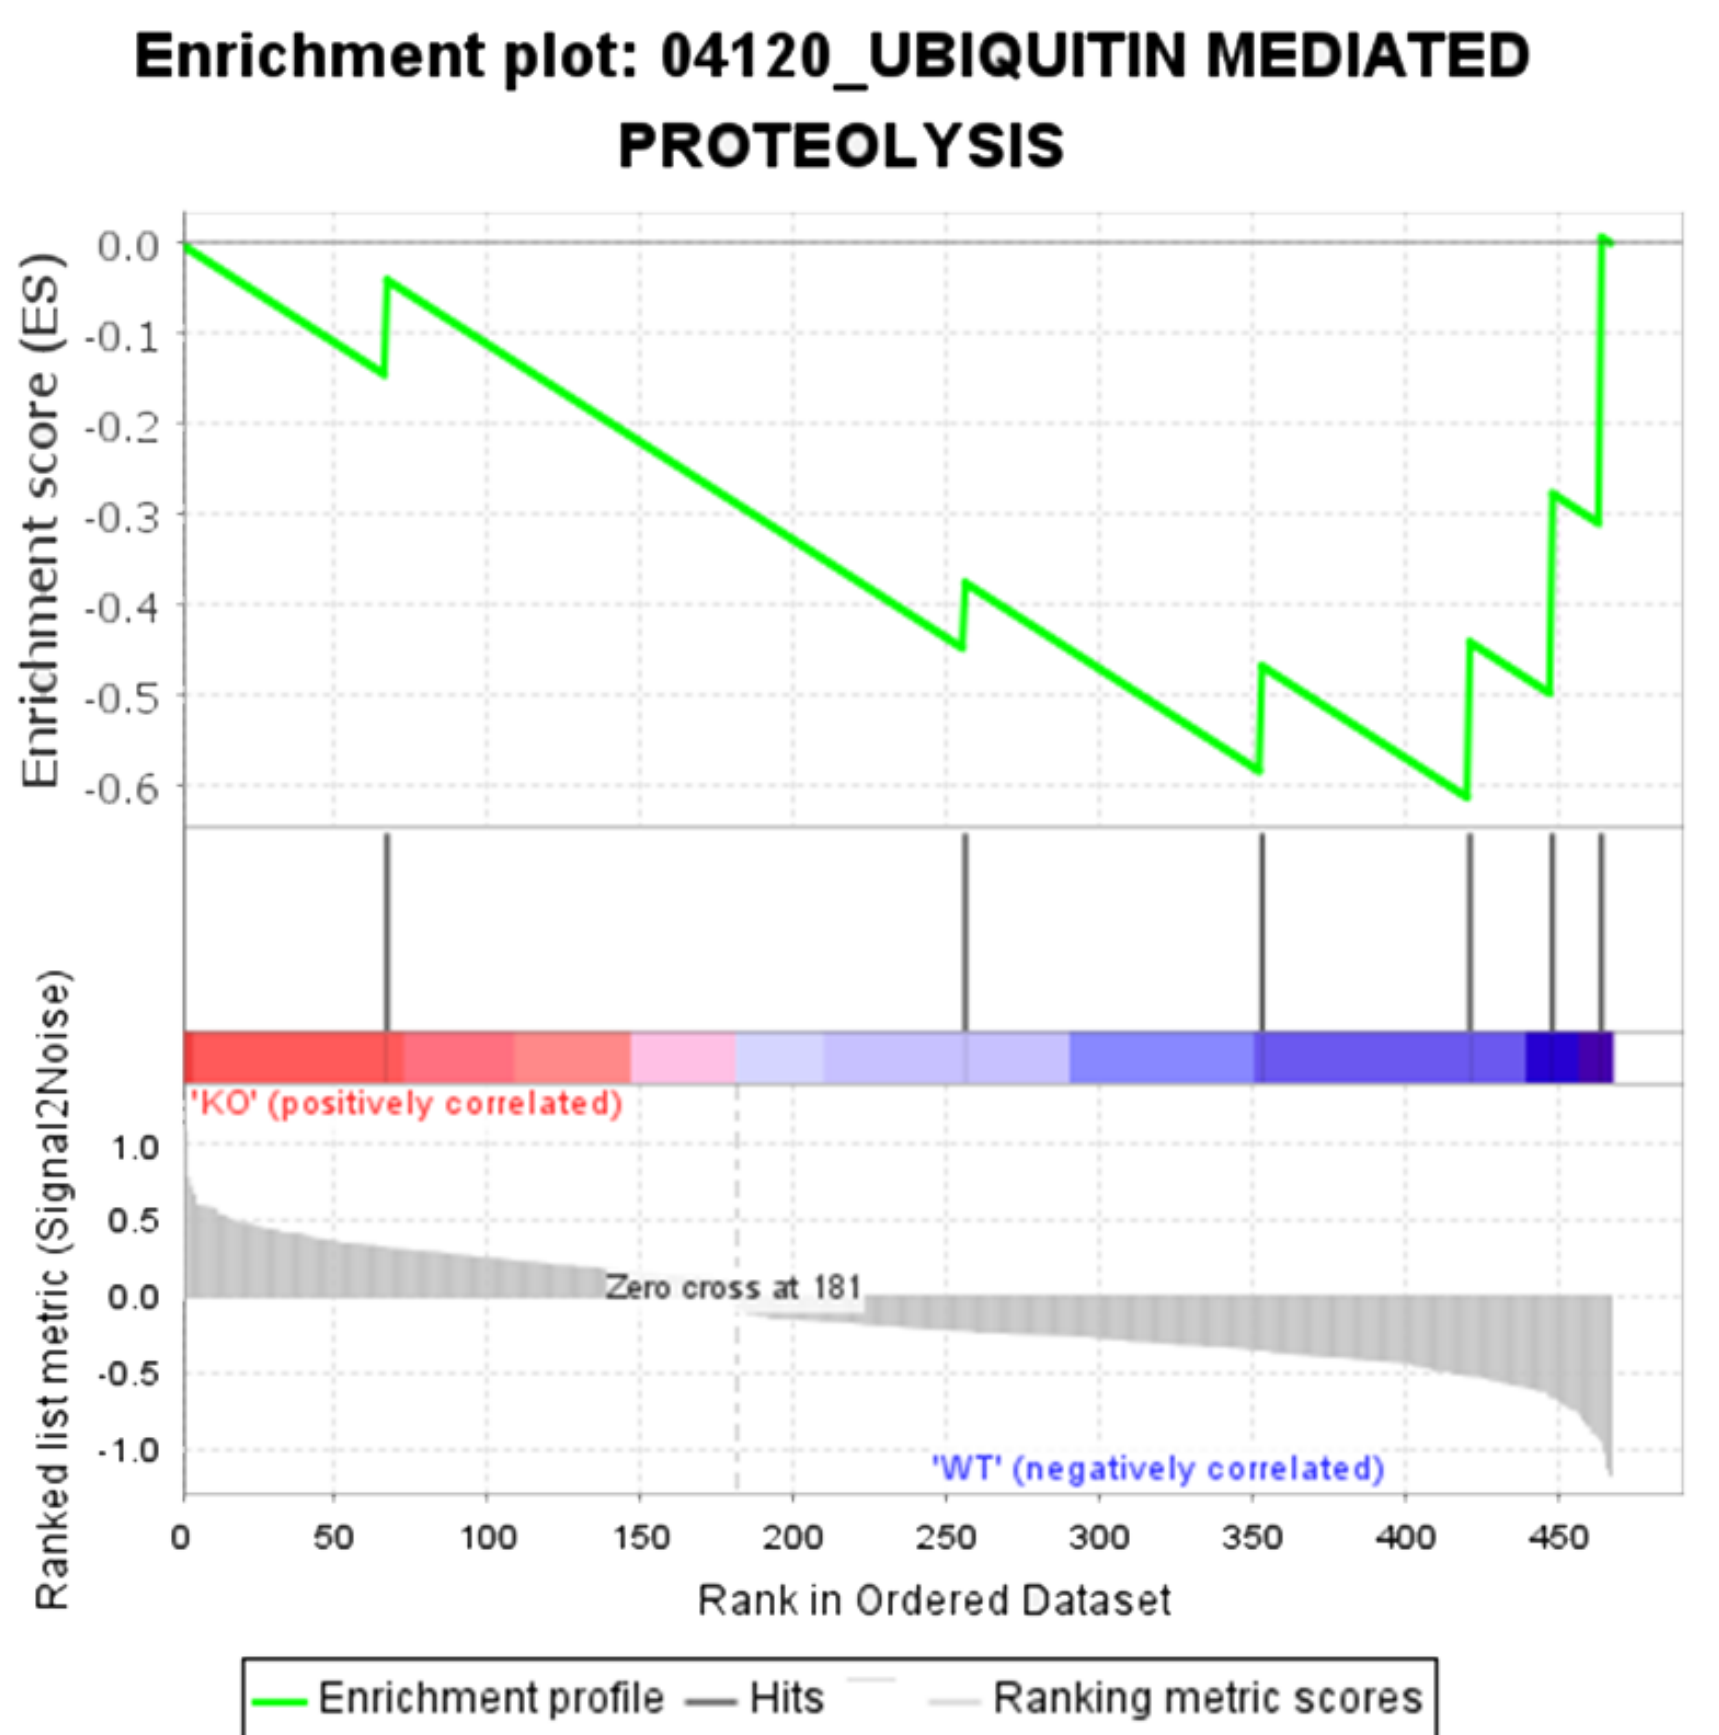**E**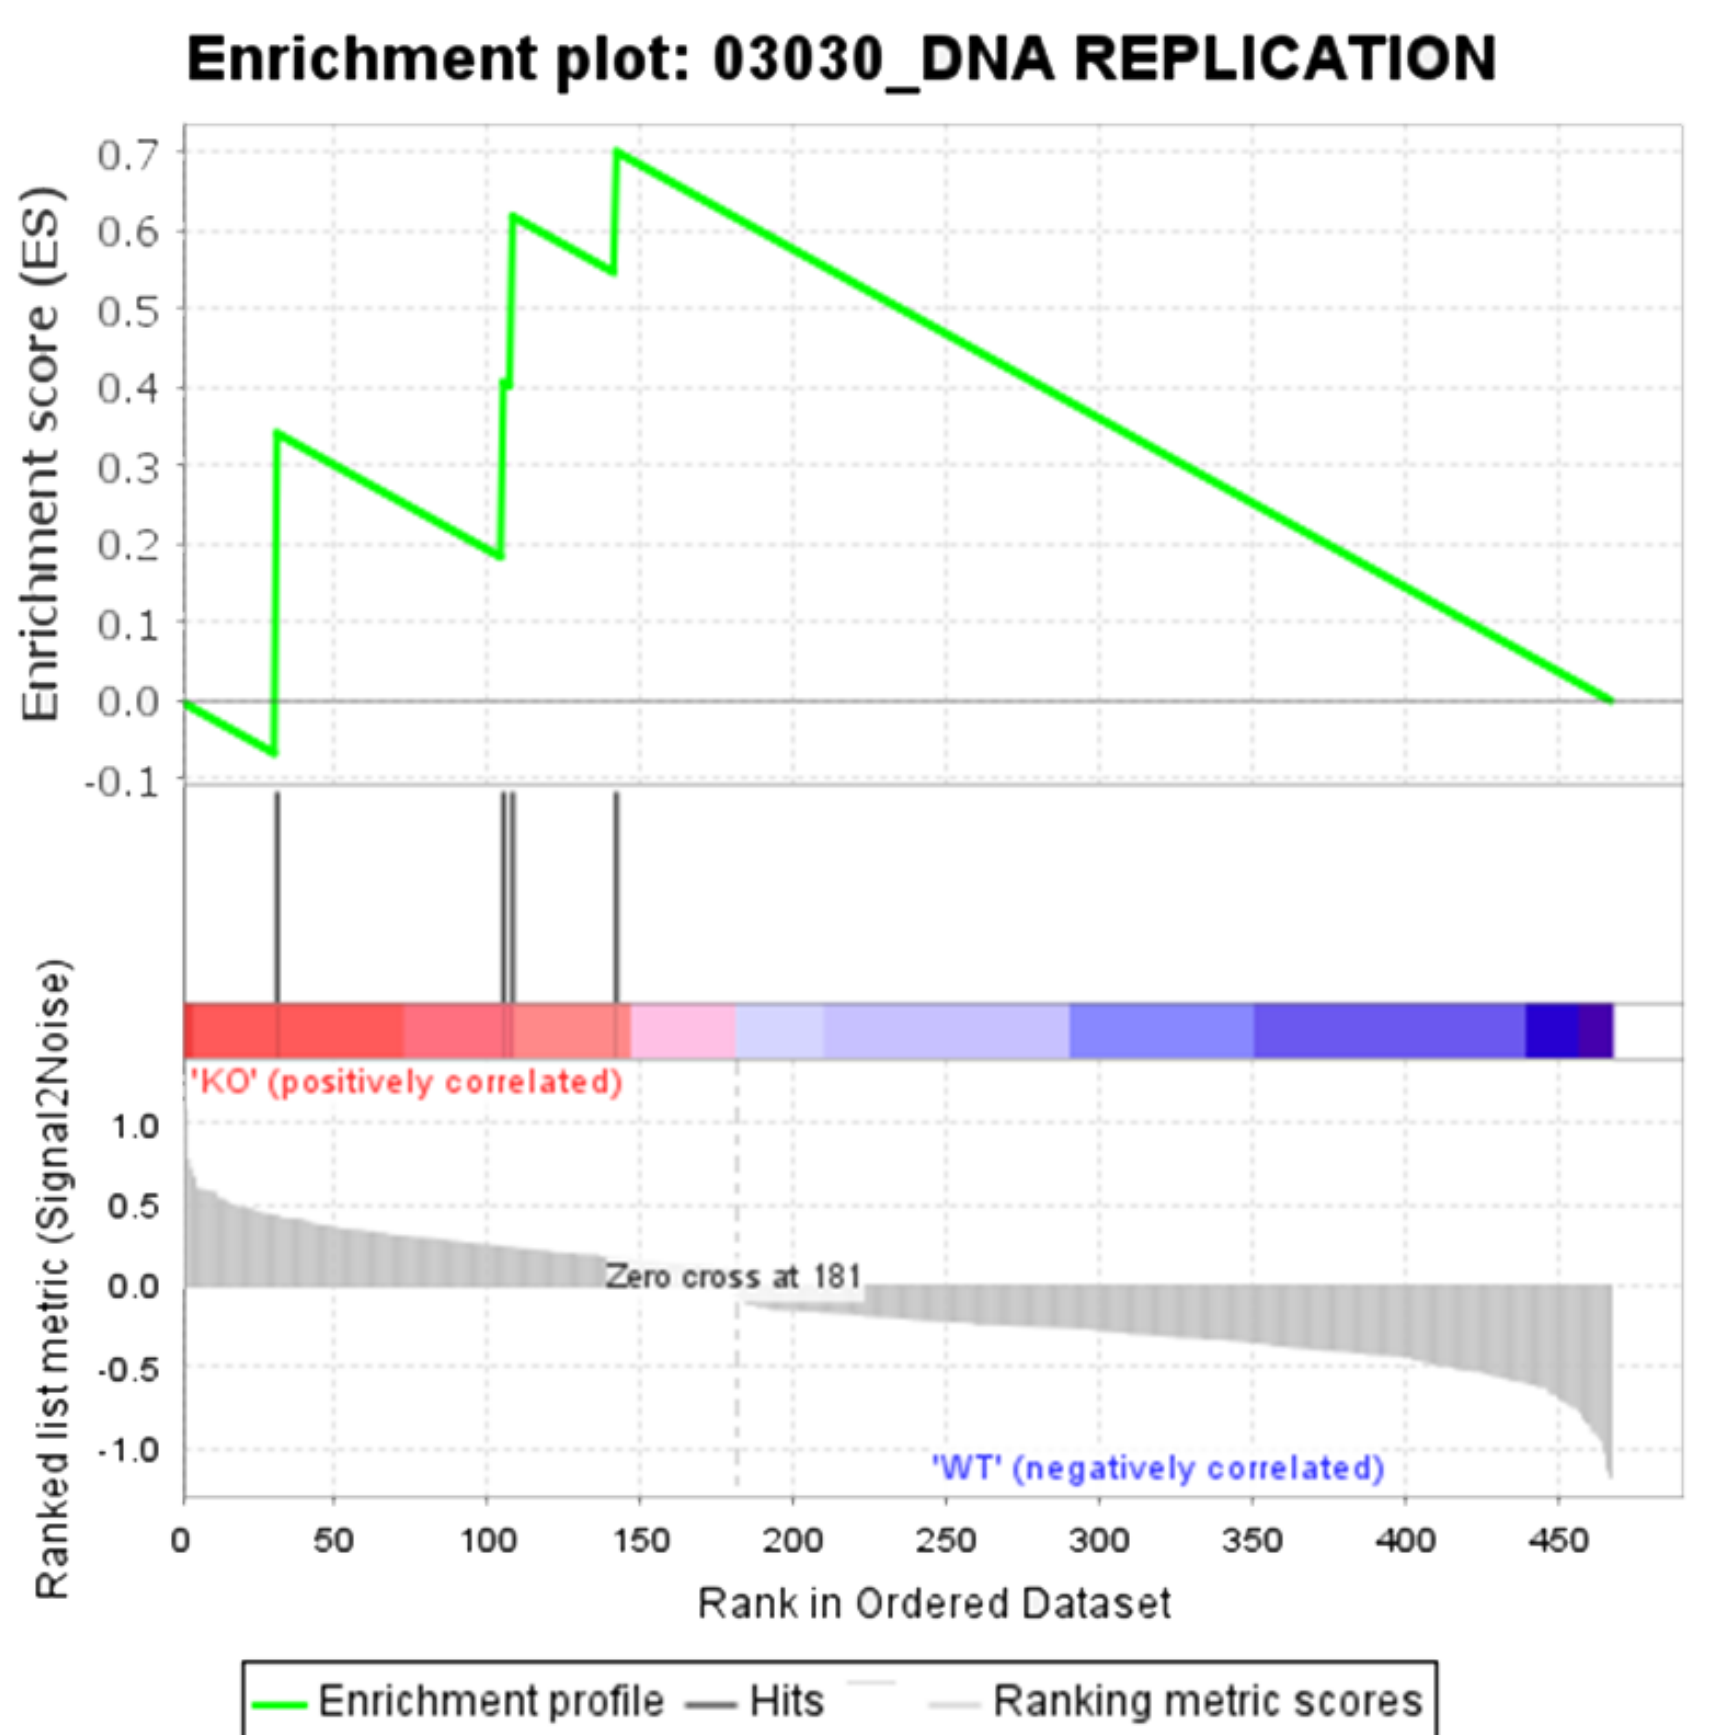

**Fig. S9. GSEA pathway analysis of genes selectively altered in *Ube2m&Ube2f*-deficient, but not *Rbx1&Sag*-deficient Treg cells**

- (A) Top 20 down-regulated genes in *Ube2m&Ube2f*-deficient, but not *Rbx1&Sag*-deficient, Treg cells.
- (B) Top 20 up-regulated genes in *Ube2m&Ube2f*-deficient, but not *Rbx1&Sag*-deficient, Treg cells.
- (C) GSEA pathway analysis of genes altered in *Ube2m&Ube2f*-deficient, but not *Rbx1&Sag*-deficient Treg cells.
- (D) Gene set enrichment analysis of ubiquitin mediated proteolysis genes in genes altered in *Ube2m&Ube2f*-deficient, but not *Rbx1&Sag*-deficient Treg cells.
- (E) Gene set enrichment analysis of DNA replication genes in genes altered in *Ube2m&Ube2f*-deficient, but not *Rbx1&Sag*-deficient Treg cells.
